# Supplementary material for: T‐circle vector strategy increases NHEJ‐mediated site‐specific integration in soybean
Source: PubMed Central journal article supplement (PMC11182580; doi:10.1111/pbi.14311), 2024-02-19

# Supporting information

**Article type:** Brief Communication

**Title:** T-circle vector strategy increases NHEJ-mediated site-specific integration in soybean

**Authors:** Xudong Ye\*, John Bradley, Larry Gilbertson

Bayer Crop Science, 700 Chesterfield Parkway West, Chesterfield, MO 63017, USA

## Materials and Methods

**Supplementary 1:** Analyses of the eight single copy site-specific integration events from the double cut vector at DT5.1 site of soybean chromosome 6

**Supplementary 2:** Fig. S1 to S6, Table S1 to S3 and genetic element sequences

**Supplementary 3:** Long-read sequencing the site-specific integration locations from T-circle vector transformation.

**Supplementary 4:** Junction analyses of 41 soybean site-specific integration events at DT5.1 from T-circle plasmids. Each event has two genomic insert junctions and one LB-RB junction inside the marker gene intron.

## Materials and Methods

### Target sequence selection.

The DT5.1 region, located near end of the soybean (*Glycine max*) chromosome 6, was selected by identifying hypomethylated regions in DNA methylation datasets in our proprietary soybean germplasm A3555, which has been disclosed in the **Supplementary 1**. The LbCas12a DT5.1 target site was selected by a proprietary gRNA finder software and is unique in the soybean genome. The target site was selected for high cutting frequency in stable transformants by Illumina sequencing of the PCR products. We observed 95% mutation frequencies at this target site across multiple experiments.

### Plasmid construction.

The essential genetic element sequences including *aadA*, *Cas12a*, *gRNA* cassettes, border variants, the GOI terminator are disclosed in **Supplementary 1**. The elements were either amplified by PCR using Q5 DNA polymerase (New England Lab) from existing plasmid templates, genomic DNA or synthesized (Bio Basic Inc., Markham, Ontario, Canada) with 20 to 25 bp overlapping sequences between the assembly junction elements in primers. The expression cassettes/elements were assembled by hot fusion method as described previously (Fu *et al.*, 2014). All binary vectors contain the *aadA* expression cassette as the

selectable marker which confers spectinomycin resistance in transgenic shoots (Brian *et al.* 2013). To remove the selectable marker, *LbCas12a* and gRNAs in progeny plants, a Cre recombinase autoexcision cassette (Ye *et al.*, 2023) was added in the T-DNA and a pair of *loxP* sites were used to flank the marker gene and the gene editing accessory genes. An *ori pRi* binary vector backbone was used for all soybean binary vector construction which is single copy in *Agrobacterium* and produces approximately 50% single copy transgenic events in regular transformation (Ye *et al.*, 2011). All plasmids were confirmed by fully sequencing.

The two plasmids designed with T-circle vector strategy are depicted in **Fig. S2**. The *aadA* marker gene is split into two pieces being placed at both T-DNA ends. The RB inner sequence after the 25 bp core sequence (**Supplementary 1**) is removed by PCR, which generates 3 bp residue after T-strand processing. Two plasmid elements are identical except for the left border length. In the plasmid 1, the inner LB sequence before 25 bp core border sequence was removed which leaves 22 bp LB residue after proper T-strand termination (**Fig. S3**). In plasmid 2, the original LB was used which leaves 285 bp inner LB sequence after T-DNA process (**Fig. S4**).

#### ***Agrobacterium* preparation and soybean transformation.**

*Agrobacterium tumefaciens* AB30 strain is used for all experiments, which is derived from the nopaline strain ABI (Ye *et al.*, 2008) by knocking out kanamycin resistance gene. The binary vectors were transformed into AB30 by electroporation and selected on LB medium with 30 mg/L gentamicin and 50 mg/L kanamycin to obtain single colonies. The vectors in *Agrobacterium* were verified by full plasmid sequencing. Soybean cultivar A3555 was used for transformation. *Agrobacterium* preparation and soybean transformation was described previously (Ye *et al.*, 2008; Martinell *et al.*, 2013) with minor modification using 150 mg/L spectinomycin instead of glyphosate for plant regeneration. Briefly, the mechanically excised meristem embryos from dry seeds were imbibed in the INO medium for 1 hour, inoculated with *Agrobacterium* using sonication. After five-day co-culture, the meristem embryo explants were selected on WPM media with 150 mg/L spectinomycin for 6 weeks. The green shoots with original hypocotyls were directly transferred into soil plugs for rooting. Leaf samples were collected after 2 weeks for DNA extraction. Independent primary transgenic plants that were produced in tissue culture are also called as transgenic events.

#### **DNA extraction and transgene copy number determination.**

Leaf samples were used for DNA extraction following the method previous described (Kouranov *et al.*, 2022). The transgene copy number was determined by TaqMan<sup>®</sup> assay following the manufacturer's instruction (ThermoFisher Scientific, Waltham, MA USA). The primers 5'- AGCTAAGCGCGAACTGCAAT-3' (forward) and 5'- GGCTCGAAGATACCTGCAAGA-3' (reverse) amplifying the *aadA* marker gene in the soybean binary vectors, and further detected by MGB (minor groove binding) TaqMan<sup>®</sup> probe 6FAM-TGGAGAATGGCAGCGCAATGACA, were used for the *aadA* selectable marker gene copy number

assay. The *ori* pRi TaqMan® primers and detection probe as described previously (Ye *et al.*, 2011) was used for all vector backbone detection.

### **DNA library construction for the genomic insertion fragments and analysis of target insertion by Illumina sequencing and PacBio Hi-Fi long-read sequencing.**

Genomic DNA (gDNA) libraries were prepared starting with at least 20 ng of gDNA (Kouranov *et al.*, 2022). Kapa HyperPlus kits (Roche) were used in a 96-well format to create individual gDNA libraries. Sizing by two-step bead purification (St. John & Quinn, 2008) of individual libraries was employed to facilitate sequencing on Illumina NovaSeq 6000 instrument. The sequence reads were assembled against the entire vector sequence and soybean genome using CLC Genomics Workbench 20.0.4 software (Qiagen). The sequences that map to the transformation vectors and genomic junction fragments were used to identify the T-DNA insertion location by BLASTn analysis using the flank sequences against the entire soybean genome.

Additional soybean transformation experiment was re-initiated with the plasmid 1 to harvest enough samples for PacBio HiFi long-read sequencing (<https://www.pacb.com/revio/>), which was used to verify the Illumina sequence assembly (**Supplementary 4**).

### **Additional references:**

- Fu, C., Donovan, W. P., Shikapwashya-Hasser, O., Ye, X. and Cole, R. H. (2014) Hot fusion: an efficient method to clone multiple DNA fragments as well as inverted repeats without ligase. *PLoS ONE*. **9**, e115318.
- Kouranov, A., Armstrong, C., Shrawat, A., Sidorov, V., Huesgen, S., Lemke, B. *et al.* (2022) Demonstration of targeted crossovers in hybrid maize using CRISPR technology. *Commun. Biol.* **5**, 53.
- Martinell, B. J., Petersen, M. W., Somers, D. A., Wan, Y., Williams, E. and Ye, X. (2013) Methods for plant transformation using spectinomycin selection. US Patent No. US8466345B2. (Washington, DC: U.S. Patent and Trademark Office). Available at: <https://patents.google.com/patent/US8466345B2/en?q=US8466345B2>
- St. John J. and Quinn T. W. (2008) Rapid capture of DNA targets. *BioTechniques*. **44**, 259-264.
- Ye, X., Williams, E. J., Shen, J., Esser, J. A., Nichols, A. M., Petersen, M.W., Gilbertson L. A. (2008) Plant development inhibitory genes in binary vector backbone improve quality event efficiency in soybean transformation. *Transgenic Res.* **17**, 827–38.
- Ye, X., Williams, E. J., Shen, J., Johnson, S., Lowe, B., Radke, S. *et al.* (2011) Enhanced production of single copy backbone-free transgenic plants in multiple crop species using binary vectors with a pRi replication origin in *Agrobacterium tumefaciens*. *Transgenic Res.* **20**, 773-86.
- Ye, X., Vaghchhipawala, Z., Williams, E. J., Fu, C., Liu, J., Lu, F., Hall, E. L. *et al.* (2023) Cre-mediated autoexcision of selectable marker genes in soybean, cotton, canola and maize transgenic plants. *Plant Cell Rep.* **42**, 45–55.

## Supplementary 1

Analyses of the eight single copy site-specific integration events from the double cut vector at DT5.1 site of soybean chromosome 6

### S1

#### Summary-Identified single insertion events with RB/LB junctions

| Event No. | Insertion is consistent with:                                                                                                  | Target |
|-----------|--------------------------------------------------------------------------------------------------------------------------------|--------|
| Event 1   | Circularization of RB→LB fragment; cleavage at DT5.1 #2, insert @ gDNA DT5.1                                                   | DT5.1  |
| Event 2   | Circularization of RB→LB fragment; cleavage at DT5.1 #2, insert @ gDNA DT5.1; large LB deletion: lox site and DT5.1 #1 missing | DT5.1  |
| Event 3   | Circularization of RB→LB fragment; cleavage at DT5.1 #1, insert @ gDNA DT5.1                                                   | DT5.1  |
| Event 4   | Circularization of RB→LB fragment; cleavage at DT5.1 #1, insert @ gDNA DT5.1                                                   | DT5.1  |
| Event 5   | Circularization of RB→LB fragment; cleavage at DT5.1 #2, insert @ gDNA DT5.1                                                   | DT5.1  |
| Event 6   | Complex event with inverted partial repeat                                                                                     | DT5.1  |
| Event 7   | Complex? Identified linkages do not support a single model (possible rearrangement/inversion of gDNA flanking sequence?)       | DT5.1  |
| Event 8   | Circularization of RB→LB fragment; cleavage at DT5.1 #2, insert @ gDNA DT5.1                                                   | DT5.1  |

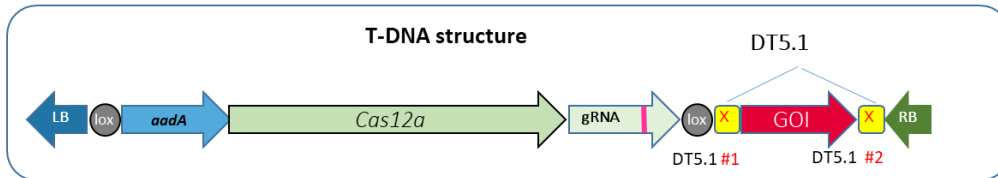

### S2

#### Keys to Figures S3, S4, and S5:

|                                                                             |                                                        |                                                                     |
|-----------------------------------------------------------------------------|--------------------------------------------------------|---------------------------------------------------------------------|
| <p><b>DT5.1 target site</b><br/>1 or 2 = pMON copy<br/>g = genomic copy</p> | <p>pMON-derived sequence<br/>→ = element direction</p> | <p>Genomic DNA-derived sequence<br/>→ = Genomic DNA orientation</p> |
|-----------------------------------------------------------------------------|--------------------------------------------------------|---------------------------------------------------------------------|

Insertions at target site in absence of evidence of a second random insertion (8 single copy targeted transgenic plants)

- Six of the eight identified events have very similar predicted insertion maps
- The similarities suggest a potential commonality of mechanism of insertion that is potentially interesting

### S3

Data predict similar molecular models for four of eight transgenic plants

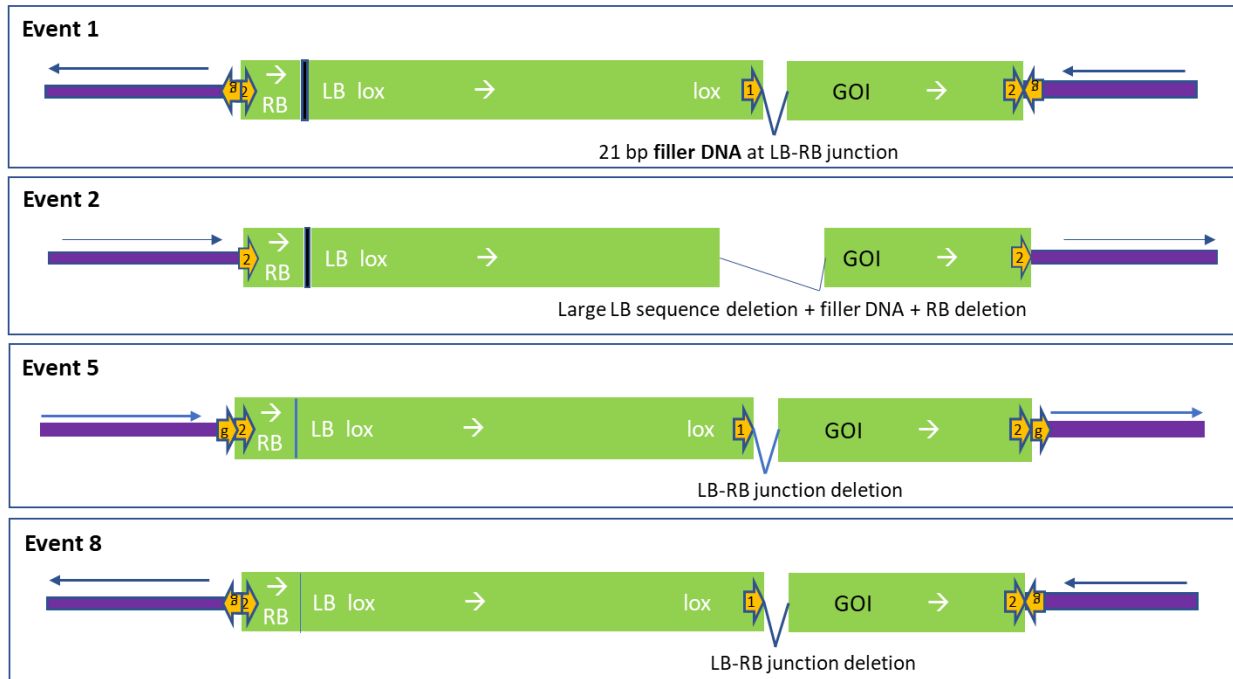

### S4

Data predict similar molecular models for two of eight transgenic plants

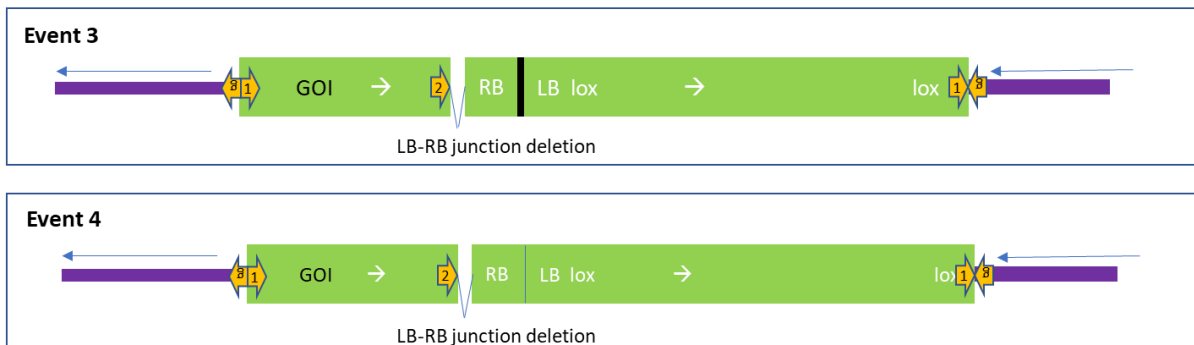

## S5

Data predict complex or unassignable molecular models for two of eight transgenic plants

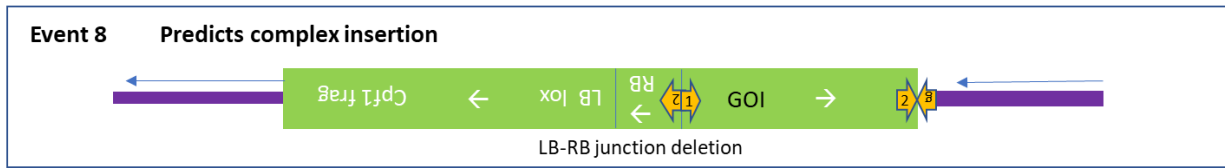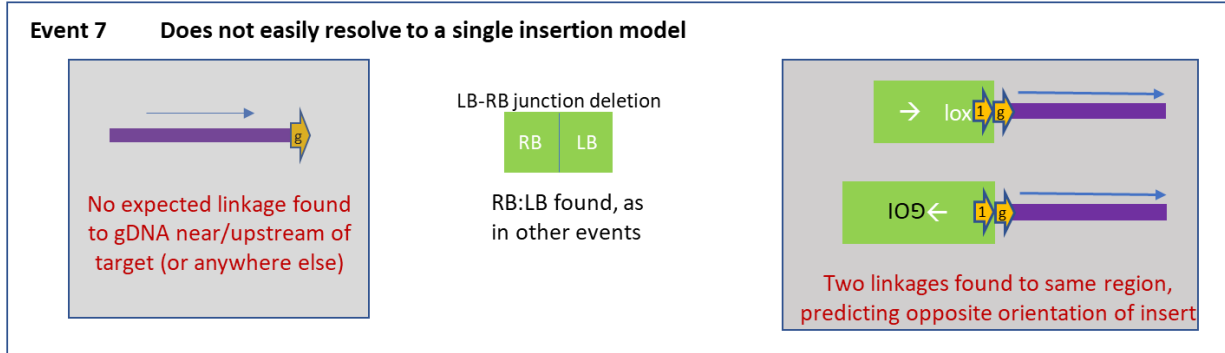

## S6

Verification of RB/LB junction from 8 soybean single copy GT plants by PCR

**A** Donor T-DNA processed by cutting before integration

**B** Recombine at DT5.1 sites, target at chromosome

**C** Recombine at DT5.1 sites, target at chromosome

**D** PCR amplification of LB/LB junctions from the 8 single copy SDI events

GATCGTGAGTTCCTCATCTAAGCCCCCATTTGGACGTGAATGAGACAGT  
 CGAAATAAAGATTTCCGAATTAGAATAATTTGTTATTGCTTCGCCTATAA  
 ATACGACGGATCGAATTTGCTGTTTTATCAAATGACTTTTCATTTTATAAT  
 AACGCTGCGGACATCTACATTTTGAATTGAAAAAAATGGAATTACTC  
 TTTCTTTTCTCCATTTGACCATCATACTCATTGCTGATCCATGATAGTTCC  
 CGGCATGAAGCCATTACAATTGAATATCTCTG/CACGTACGATCATCA  
 CACCAAAAGTTAGGCCGAATGTTGAAATTAGAAGCTCGCAATTGAG  
 GTCTACAGGCCAAATTCGCTCTTAGCCGTAACAATTAATCAACGGTGGAT  
 GCCCCCATCGTAGGTGAAGTGGAAATTAATGATCCATCTTGAGACCACA  
 GGCCCAACAGCTACAGTTTCTCAAGGTTCCCAACAAAACGTAAGCGC  
 TTACGTACA TGGTCGATAAGAAAGGCAATTTG TAGATGTTAACATCAAC  
 GTCGCTTTCAGGGATCCTTGCTACCTTAAGAGAGC-aadA marker

Note for D: red font LB residue; blue font RB residue; 22 bp LB and 3 bp RB residue junction is highlighted in green. PCR Primers are under lined.

Note for E: LB residue is black highlighted. The 22 bp LB and 3 bp RB residue junction is indicated by red arrows.

**E** PCR detect RB/LB junctions

Event 1

Event 2

Event 3

Event 4

Event 5

Event 6

Event 7

Event 8

## Supplementary 2

Fig. S1 to S6, Table S1 to S3 and genetic element sequences

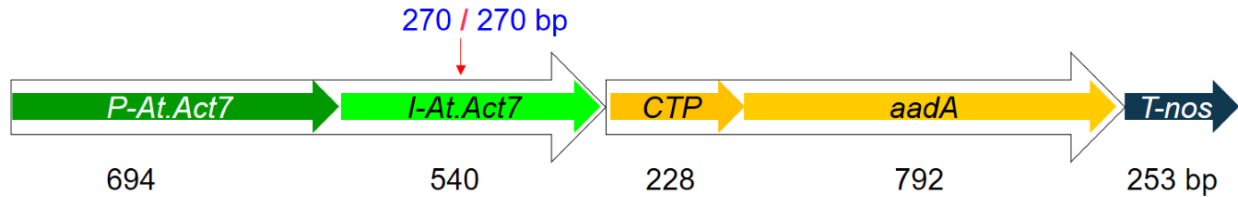

**Fig. S1: The *aadA* marker gene structure.** The marker gene is split into 2 parts at the middle of the *Arabidopsis Act7* intron as indicated by a vertical arrow and used in the T-DNA of Fig. S2. ***P-At.Act7***: *Arabidopsis* actin 7 promoter; ***I-Act7 3'***: 270 bp of actin 7 intron 3' sequence; ***I-Act7 5'***: 270 bp of actin 7 intron 5' sequence; ***aadA***: encoding aminoglycoside-3"-adenyltransferase for spectinomycin resistance for plant selection; ***T-nos***: nopaline synthase terminator from *Agrobacterium*;

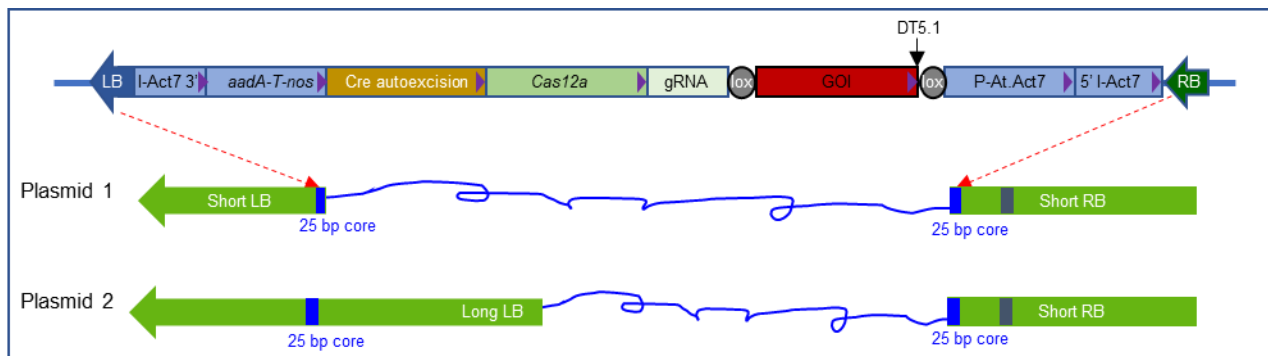

**Fig. S2: T-DNA structures of the two T-circle-forming binary vectors for soybean transformation.** Plasmid 1 and plasmid 2 are identical except for the left border length. The two parts of the split *aadA* marker gene are placed at T-DNA ends. The genetic elements for the *aadA* expression are indicated in Fig S1. **LB**: left border; **lox**: 34 bp *loxP* site for Cre recombinase excision; **Cre**: Cre recombinase driven by a developmentally regulated promoter for marker gene autoexcision; **Cas12a**: *LbCas12a* expression cassette; **gRNA**: 23 bp DT5.1 target site gRNA is expressed by a soybean U6 promoter and terminated by polyT; **GOI**: gene of interest; **RB**: right border. The border sequences and 25 bp core motif are provided in this supplementary information. The vertical arrowhead indicates the *LbCas12a* target site with TTTA PAM to re-linearize the circularized T-DNA after RB-LB end joining.

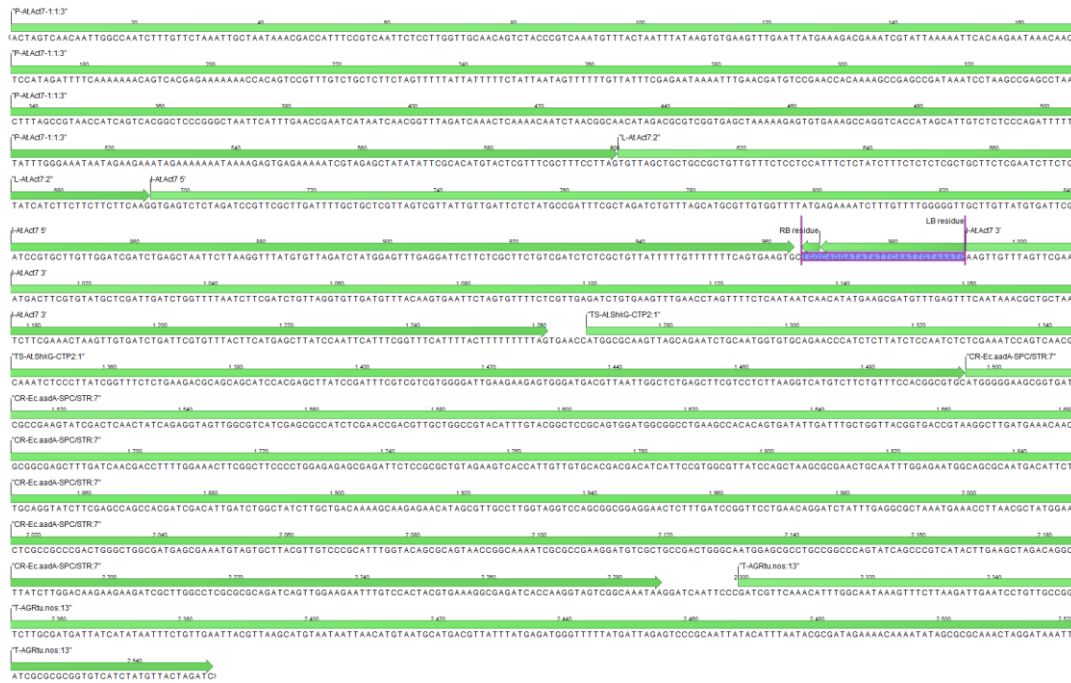

**Fig. S3: The expected junction of the shortened RB and the shortened LB after T-DNA circularization and re-linearization from plasmid 1 in transgenic soybean plants. A 27 bp border residue in the middle of the intron from *Arabidopsis Act7* promoter is blue highlighted.**

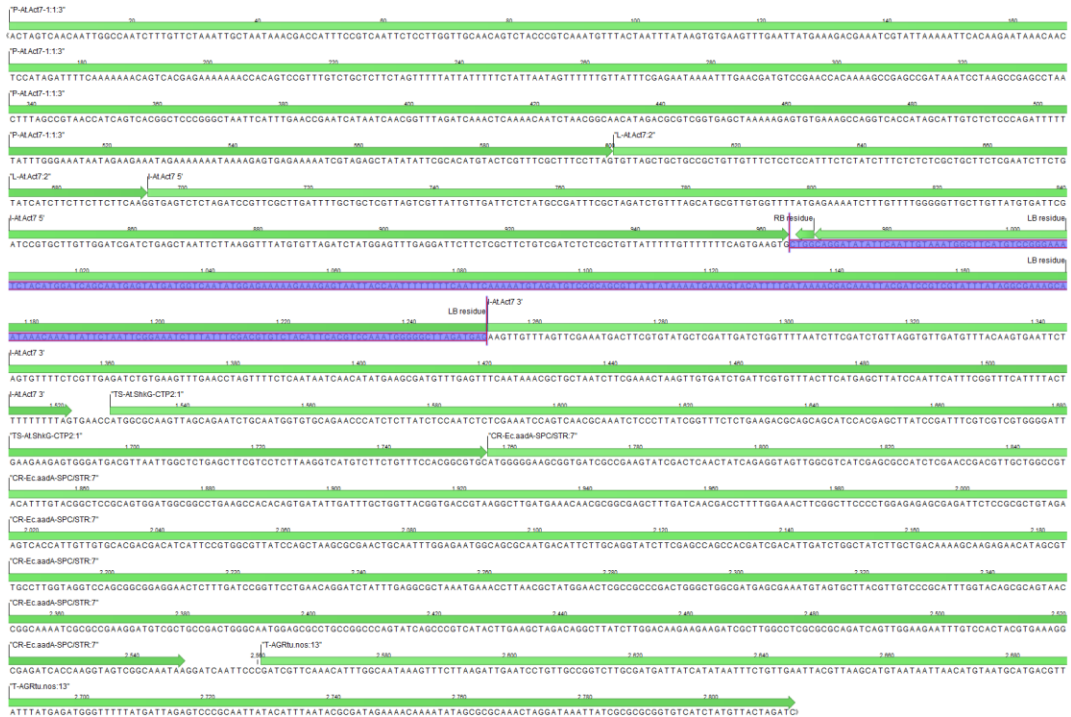

**Fig. S4: The expected junction of the shortened RB and the full length of LB after T-DNA circularization and re-linearization from plasmid 2 in transgenic soybean plants. A 289 bp border residue in the middle of the intron from *Arabidopsis Act7* promoter is blue highlighted.**



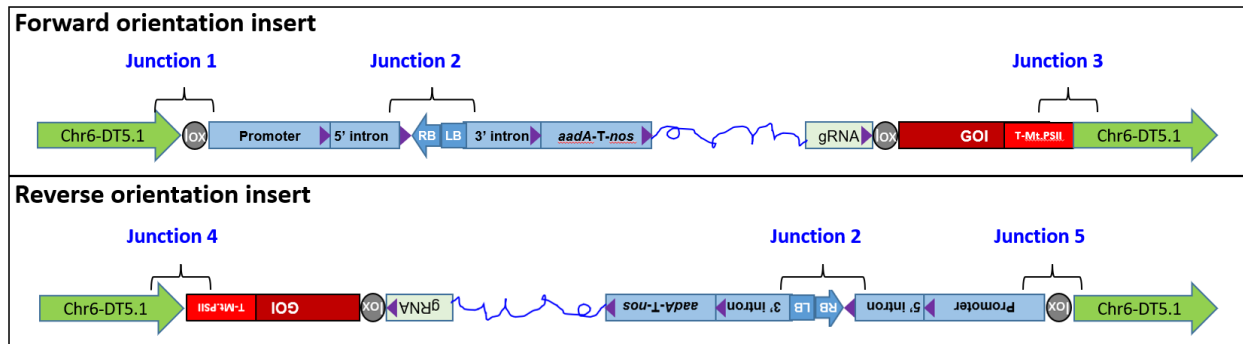

**Fig. S5: Illustration of insert orientations after T-DNA circularization and re-linearization by NHEJ-mediated site-specific integration. T-Mt.PSII:** the transcription terminator of *Medicago truncatula* photosystem II 5 kD protein (GenBank accession # XM\_003599210.4, region 398..548); **Chr6-DT5.1:** soybean chromosome 6, DT5.1 target location. Other genetic elements have been indicated in Fig. S2.

- Junction 1      **TTTAGACTTTAGCTCCTCTGTTG/AGTC** (chromosome/plasmid cut junction)  
 Junction 2:      RB/LB junction inside the intron, see Fig. S3 and S4 for plasmid 1 and 2, respectively  
 Junction 3:      **TTTAGACTTTAGCTCCTCTGTTG/AGTC** (plasmid cut junction/chromosome)  
 Junction 4:      **GACT/AGTC** (chromosome/plasmid cut junction)  
 Junction 5      **TTTAGACTTTAGCTCCTCTGTTG/CAACAGAGGAGCTAAAGTCTAAA**  
 (plasmid cut/chromosome junction)

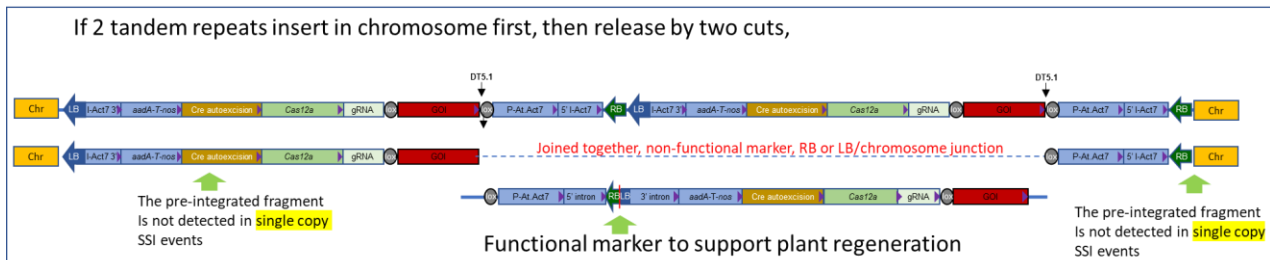

**Fig. S6: Illustration of a functional marker unit may be released by double cuts from tandem repeats which may occur only in multiple copy events at rare frequency. Note:** If a functional marker unit is released by simultaneous double cuts from multiple copy tandem repeats and integrated as a SSI event at the target locus, a non-functional marker fragment should be present in other chromosome with RB and LB/chromosome junctions. This may occur less likely because most single copy SSI events in our initial experiment with double cut design (**Fig. 1B, Supplementary 1**) were cut once and recombined with the rest part of inserts. The integration pattern by releasing a functional marker unit from tandem repeats with double cuts, if it occurs, is similar to the co-transformation of 2 T-DNAs: one with split marker at the T-DNA ends, and the other with the functional marker by RB-LB end-joining to form a T-circle followed by re-linearization. In all single copy SSI events that we have analyzed so far, the chromosomal junctions with RB and LB do not exist but RB-LB junction inside the *Arabidopsis Act7* intron. Therefore, it's plausible to believe that the single copy SSI events are derived from single T-DNA end-joining (T-circle) followed by re-linearization.

**Table S1: Site-specific integration (SSI) frequency improvement in the T-circle vector design with split marker in soybean transformation**

| Construct          | Initial explants | Events in soil plugs | TF    | 1 copy | Backbone positive | Analyzed samples | 1 copy SSI rate   | 2 copy SSI rate  |
|--------------------|------------------|----------------------|-------|--------|-------------------|------------------|-------------------|------------------|
| Control            | 30000            | 1824                 | 6.10% | 47%    | 20%               | 1670             | 0.3%<br>(5/1670)  | N/A              |
| Plasmid 1 short LB | 48000            | 1437                 | 3%    | 23%    | 59%               | 336              | 2.97%<br>(10/336) | 1.49%<br>(5/336) |
| Plasmid 2 long LB  | 48000            | 761                  | 1.58% | 22%    | 46%               | 336              | 2.08%<br>(7/336)  | 0.89%<br>(3/336) |

**Note:** Plasmid 1 and 2 are identical except for the LB length (**Fig. S2**). TF: transformation frequency= transgenic plants/number of explants. 1 copy: frequency of single copy transgenic plants regardless of backbone. Backbone positive: frequency of *ori* pRi backbone probe detection positive plants. 1 copy SSI rate: SC-BF-PGE events. The SSI rate is defined as the SSI events/analyzed samples. 2 SSI copy events: two inserts, one in target site with perfect genetic elements, the other in other chromosome location. N/A: not available.

**Table S2: Target assay summary of the events from the plasmid 1 with short LB**

| Sequence ID | Backbone | <i>aadA</i> copy | T-DNA location                | On-target | Insert direction | Notes                                    |
|-------------|----------|------------------|-------------------------------|-----------|------------------|------------------------------------------|
| #19-060     | neg      | 2                | Single, on-target             | YES       | REV              |                                          |
| #19-068     | neg      | 1                | Single, on-target             | YES       | REV              | 3 bp lox truncation                      |
| #19-069     | neg      | 1                | Single, on-target             | YES       | REV              |                                          |
| #19-070     | neg      | 1                | Single, on-target             | YES       | REV              | 13 bp insert at T-DNA::Chr junction      |
| #19-074     | neg      | 1                | Single, on-target             | YES       | REV              | 2 bp lox truncation                      |
| #19-075     | neg      | 1                | Single, on-target             | YES       | REV              |                                          |
| #19-079     | neg      | 1 or 2           | Single, on-target             | YES       | REV              |                                          |
| #19-084     | neg      | 1                | Single, on-target             | YES       | REV              |                                          |
| #19-085     | neg      | 3                | Single, on-target             | YES       | REV              | Duplicate T-DNA insert                   |
| #19-093     | neg      | 1                | Single, on-target             | YES       | REV              | large deletion, rearrangement            |
| #19-095     | neg      | 2                | Single, on-target             | YES       | REV              | Duplicate T-DNA insert                   |
| #19-097     | neg      | 0 or 1           | Single, on-target             | YES       | REV              |                                          |
| #19-098     | neg      | 1                | Single, on-target             | YES       | REV              |                                          |
| #19-099     | neg      | 1                | Single, on-target             | YES       | REV              |                                          |
| #19-101     | neg      | 1                | Single, on-target             | YES       | REV              |                                          |
| #19-076     | neg      | 1                | Single, on-target             | YES       | FWD              | 1 bp lox truncation                      |
| #19-094     | neg      | 1                | Single, on-target             | YES       | FWD              | 9 bp lox truncation                      |
| #19-103     | neg      | 1                | Single, on-target             | YES       | FWD              | 11 bp lox truncation                     |
| #19-065     | neg      | 2                | On-target + Chr13             | YES       | REV              | +Chr13 insert                            |
| #19-067     | neg      | 2                | On-target + Chr18 (RI)        | YES       | REV              | 2 bp lox truncation (also, RI on Chr18)  |
| #19-072     | neg      | 1                | On-target + Chr15 (RI, short) | YES       | REV              | + small insert on Chr15                  |
| #19-087     | neg      | 2                | On-target + Chr20 (RI)        | YES       | REV              | + insert on Chr20                        |
| #19-088     | neg      | 2                | On-target + Chr11(RI)         | YES       | REV              | + ambiguous insert on Chr11              |
| #19-089     | neg      | 1                | On-target + Chr06(RI)         | YES       | REV              | + insert on Chr06                        |
| #19-106     | neg      | 3                | On-target + Chr12             | YES       | REV              | + insert on Chr12                        |
| #19-062     | neg      | 2                | On-target + Chr01 (RI)        | YES       | FWD              | 12 bp lox truncation (also, RI on Chr01) |
| #19-086     | neg      | 2                | On-target + Chr09 (RI)        | YES       | FWD              | 2 bp lox truncation (also, RI on Chr09)  |

|         |     |   |                                   |     |         |                                          |
|---------|-----|---|-----------------------------------|-----|---------|------------------------------------------|
| #19-096 | neg | 1 | On-target + Chr20(RI)             | YES | FWD     | 30 bp lox truncation (also, RI on Chr20) |
| #19-057 | neg | 2 | On-target + Chr09 + Chr19         | YES | REV     | too many inserts                         |
| #19-058 | POS | 3 | On-target, BKB                    | YES | FWD     | BKB                                      |
| #19-061 | POS | 1 | On-target + Chr12 (RI)            | YES | unclear | BKB                                      |
| #19-063 | neg | 3 | On-target, large Chr gap + Chr05  | YES | REV     | Big Chr06 deletion                       |
| #19-064 | neg | 2 | On-target                         | YES | n/a     | inverted repeat?                         |
| #19-066 | POS | 1 | On-target, BKB                    | YES | REV     | BKB                                      |
| #19-078 | neg | 1 | On-target + Chr06 + Chr13         | YES | FWD     | too many inserts                         |
| #19-080 | POS | 2 | On-target + Chr20                 | YES | REV     | BKB                                      |
| #19-081 | POS | 2 | On-target                         | YES | REV     | BKB                                      |
| #19-083 | POS | 2 | On-target + Chr01 (RI)            | YES | REV     | BKB                                      |
| #19-091 | neg | 1 | On-target + Chr08(RI) + Chr13(RI) | YES | REV     | too many inserts                         |
| #19-100 | POS | 1 | huge Chr06 deletion, BKB          | YES | REV     | Big Chr06 deletion, 2nd Chr06 insert     |
| #19-102 | POS | 1 | On-target, BKB                    | YES | REV     | BKB                                      |
| #19-059 | neg | 2 | Chr02                             | no  |         |                                          |
| #19-071 | neg | 2 | Chr06, off-target, complex        | no  |         |                                          |
| #19-077 | POS | 1 | Chr16, backbone                   | no  |         | BKB                                      |
| #19-082 | POS | 1 | Chr18, Chr10 Chr16                | no  | .       | BKB                                      |
| #19-090 | neg | 2 | Chr14                             | no  | .       |                                          |
| #19-092 | neg | 3 | Chr13, Chr07                      | no  | .       |                                          |
| #19-104 | POS | 1 | Chr10, Chr19, Chr07               | no  | .       |                                          |
| #19-105 | neg | 2 | Chr11                             | no  | .       |                                          |

**Note: Sequence ID:** each represents DNA sample from independent transgenic soybean event.

**Backbone:** vector backbone presence detection by Taqman®, shown as negative (neg) or positive (POS). **aadA copy:** aadA transgene copy number determined by Taqman® using aadA probe. **T-DNA location:** the chromosome location of T-DNA insert(s). **On-target:** T-DNA insert at the expected DT5.1 target site at the chromosome 6. **Color code: dark green:** single copy SC-BF-PGE SSI events; **light green:** 2 copy SSI events with one SC-BF-PGE insert; **blue highlighted:** SSI events with loxP junction deletion. **Insert direction:** two insertion orientations [forward (FWD) or reverse (REV)] as shown in Fig. S5. Other abbreviations: **Chr01**= chromosome 01, and so on; **RI**=random insert; **inv rep**=inverted repeats; **BKB**=backbone.

**Table S3: Target assay summary of the events from the plasmid 2 with long LB**

| <u>Sequence ID</u> | <u>backbone</u> | <u>aadA copy</u> | <u>T-DNA location</u>       | <u>On-target</u> | <u>Insert direction</u> | <u>Notes</u>                |
|--------------------|-----------------|------------------|-----------------------------|------------------|-------------------------|-----------------------------|
| #19-004            | neg             | 1                | On-target                   | YES              | REV                     | 1 bp lox truncation complex |
| #19-006            | neg             | 1                | On-target                   | YES              | REV                     |                             |
| #19-014            | neg             | 1                | On-target                   | YES              | REV                     |                             |
| #19-015            | neg             | 1                | On-target                   | YES              | REV                     | 29 bp terminator truncation |
| #19-020            | neg             | 1 or 2           | On-target                   | YES              | REV                     |                             |
| #19-030            | neg             | 1                | On-target                   | YES              | REV                     |                             |
| #19-031            | neg             | 1                | On-target                   | YES              | REV                     | weak linkages, BKB??        |
| #19-032            | neg             | 1                | On-target                   | YES              | REV                     |                             |
| #19-034            | failed          | failed           | On-target                   | YES              | REV                     |                             |
| #19-045            | neg             | 1                | On-target                   | YES              | REV                     |                             |
| #19-044            | neg             | 3                | On-target + Chr01 (RI)      | YES              | REV                     | + Chr01, other complexity?  |
| #19-047            | neg             | 1 or 2           | On-target + Chr08 (inv rep) | YES              | REV                     | + Chr08, other complexity?  |
| #19-029            | neg             | 2                | On-target, + Chr03 ins?     | YES              | FWD                     | 5 bp truncation lox         |

|         |     |        |                                    |     |         |                            |
|---------|-----|--------|------------------------------------|-----|---------|----------------------------|
| #19-035 | neg | 1      | On-target + R15 (RI)               | YES | FWD     | + Chr15, other complexity? |
| #19-002 | neg | 1      | complex on-target + Chr18          | YES | complex | complex on target          |
| #19-016 | neg | 2      | on-target + Chr04+Chr20 (RI)       | YES | REV     | 3 inserts                  |
| #19-022 | neg | 1      | Chr06 on-target, Chr01, Chr06 (RI) | YES | REV     | complex on target?         |
| #19-025 | POS | 1      | On-target, backbone                | YES | REV     | BKB                        |
| #19-026 | POS | 1      | On-target, backbone                | YES | REV     | BKB                        |
| #19-027 | POS | 1      | On-target, backbone                | YES | REV     | BKB                        |
| #19-040 | POS | 1      | On-target + Chr04 (RI)             | YES | REV     | BKB                        |
| #19-001 | neg | 2      | Chr15 (RI)                         | no  |         |                            |
| #19-003 | neg | 1      | Chr07, Chr06 (off-target)          | no  |         |                            |
| #19-005 | neg | 1      | Chr20 (RI)                         | no  |         |                            |
| #19-007 | neg | 2      | Chr11 (RI)                         | no  |         |                            |
| #19-008 | neg | 1      | Chr02 (RI)                         | no  |         |                            |
| #19-009 | neg | 0 or 1 | Chr10 (RI)                         | no  |         |                            |
| #19-010 | neg | 2      | Chr20 (Inv rep)                    | no  |         |                            |
| #19-011 | neg | 3      | Chr07 (RI)                         | no  |         |                            |
| #19-012 | neg | 2      | Chr18 (inv rep, truncation)        | no  |         |                            |
| #19-013 | POS | 1      | RI                                 | no  |         |                            |
| #19-017 | neg | 1      | Chr10 (RI)                         | no  |         |                            |
| #19-018 | neg | 1      | Chr12 RI                           | no  |         |                            |
| #19-019 | POS | 1      | Chr04 RI                           | no  |         |                            |
| #19-021 | neg | 2      | Chr17 (RI)                         | no  |         |                            |
| #19-023 | neg | 2      | Chr07 (RI)                         | no  |         |                            |
| #19-024 | POS | 1      | Chr19 (RI)                         | no  |         |                            |
| #19-028 | POS | 2      | Chr19 (RI)                         | no  |         |                            |
| #19-033 | neg | 1      | Chr13 (RI)                         | no  |         |                            |
| #19-036 | neg | 3      | Chr13 (RI)                         | no  |         |                            |
| #19-037 | neg | 3      | Chr13 (RI)                         | no  |         |                            |
| #19-038 | neg | 3      | Chr18 Chr15 (inv rep)              | no  |         |                            |
| #19-039 | POS | 1      | Chr10 (RI), BKB                    | no  |         |                            |
| #19-041 | neg | 1      | Chr17 inv rep/truncation           | no  |         |                            |
| #19-042 | neg | 2      | Chr02 (RI)                         | no  |         |                            |
| #19-043 | POS | failed | Chr01 (RI), Chr05 (inv rep)        | no  |         |                            |
| #19-046 | neg | 3      | Chr09 complex                      | no  |         |                            |
| #19-048 | POS | 1      | Chr13, Chr07, Chr09 (RI)           | no  |         |                            |

**Note: Sequence ID:** each represents DNA sample from independent transgenic soybean event.

**Backbone:** vector backbone presence detection by Taqman®, shown as negative (neg) or positive (POS). **aadA copy:** *aadA* transgene copy number determined by Taqman® using *aadA* probe. **T-DNA location:** the chromosome location of T-DNA insert(s). **On-target:** T-DNA insert at the expected DT5.1 target site at the chromosome 6. **Color code:** **dark green:** single copy SC-BF-PGE SSI events; **light green:** 2 copy SSI events with one SC-BF-PGE insert; **blue highlighted:** SSI events with loxP junction deletion. **Insert direction:** two insertion orientations [forward (FWD) or reverse (REV)] as shown in Fig. S5. Other abbreviations: **Chr01**= chromosome 01, and so on; **RI**=random insert; **inv rep**=inverted repeats; **BKB**=backbone.

## Genetic element sequences

**Full length right border (RB) sequence** (25 bp core border sequence is highlighted, GenBank accession no. CP033030.1, region 99813..100317) (Holsters et al. (1983))

5' CGAAGCTCGGTCCCCTGGGTGTTCTGTCGTCTCGTTGTACAACGAAATCCATTCCCATTCCGCGCTCAAGATGGC  
TTCCCCTCGGCAGTTCATCAGGGCTAAATCAATCTAGCCGACTTGTCCGGTGAAATGGGCTGCACTCCAACAGAAAC  
AATCAAACAAACATACACAGCGACTTATTCACACGAGCTCA**AATTACAACGGTATATATCCTGCCA**GTCAGCATCAT  
CACACAAAAGTTAGGCCCGAATAGTTTGAATTAGAAAGCTCGCAATTGAGGTCTACAGGCCAAATTCGCTCTTAG  
CCGTACAATATTACTACCCGGTGCATGCCCCCATCGTAGGTGAAGGTGGAAATTAATGATCCATCTTGAGACCAC  
AGGCCACAACAGCTACCAGTTTCTCAAGGGTCCACAAAACGTAAGCGCTTACGTACATGGTTCGATAAGAAAAG  
GCAATTTGTAGATGTTAACATCCAACGTCGCTTTTCAGGGATCCTT 3'

**Shortened right border (RB) sequence (25 bp core border sequence is highlighted)**

5' CGAAGCTCGGTCCCCTGGGTGTTCTGTCGTCTCGTTGTACAACGAAATCCATTCCCATTCCGCGCTCAAGATGGC  
TTCCCCTCGGCAGTTCATCAGGGCTAAATCAATCTAGCCGACTTGTCCGGTGAAATGGGCTGCACTCCAACAGAAAC  
AATCAAACAAACATACACAGCGACTTATTCACACGAGCTCA**AATTACAACGGTATATATCCTGCCA** 3'

**Full length left border (LB) sequence** (25 bp core border sequence is highlighted, GenBank accession no. CP033030.1, region 86792..87233) (Holsters et al. (1983))

5' CTCATCTAAGCCCCATTTGGACGTGAATGTAGACACGTCGAAATAAAGATTTCCGAATTAGAATAATTTGTTTA  
TTGCTTTTCGCTATAAATACGACGGATCGTAATTTGTCGTTTTATCAAATGTACTTTCATTTTTATAATAACGCTGC  
GGACATCTACATTTTTGAATTGAAAAAAATTGGTAATTACTCTTTCTTTTTCTCCATATTGACCATCATACTCATT  
GCTGATCCATGTAGATTTCCCGGACATGAAGCC**AATTACAATTGAATATATCCTGCCG**CCGCTGCCGCTTTGCACCC  
GGTGGAGCTTGCATGTTGGTTTCTACGCAGAACTGAGCCGGTTAGGCAGATAATTTCCATTGAGAAGTGAAGCCATGT  
GCACCTTCCCCCAACACGGTGAGCGACGGGGCAACGGAGTGATCCACATGGGACTTTT 3'

**Shortened left border (LB) sequence (25 bp core border sequence is highlighted)**

5' C**AATTACAATTGAATATATCCTGCCG**CCGCTGCCGCTTTGCACCCGGTGGAGCTTGCATGTTGGTTTCTACGCAG  
AACTGAGCCGGTTAGGCAGATAATTTCCATTGAGAAGTGAAGCCATGTGCACCTTCCCCCAACACGGTGAGCGACGG  
GGCAACGGAGTGATCCACATGGGACTTTT 3'

### Reference:

Holsters, M., Villarroel, R., Gielen, J. et al. (1983) An analysis of the boundaries of the octopine TL-DNA in tumors induced by *Agrobacterium tumefaciens*. *Mol Gen Genet* **190**, 35–41.

**The *aadA* selectable marker gene expression cassette sequence (Fig. S1, S2, S3, S4):**

*Arabidopsis thaliana* actin 7 promoter in UPPER CASE

CTP-chloroplast transit peptide in *lower case, italic*

*aadA* coding sequence in **UPPER CASE, bold**

nos terminator: lower case, underlined

5' ACTAGTCAACAATTGGCCAATCTTTGTTCTAAATTGCTAATAAACGACCATTTCCGTCAATTCTCCTTGGTTGCA  
ACAGTCTACCCGTCAAATGTTTACTAATTTATAAGTGTGAAGTTTGAATTATGAAAGACGAAATCGTATTAATAAAT  
CACAAGAATAAACAACCTCCATAGATTTTCAAAAAACAGTCACGAGAAAAAACACAGTCCGTTTGTCTGCTCTTC  
TAGTTTTTATTATTTTTCTATTAATAGTTTTTTGTTATTTTCGAGAATAAAATTTGAACGATGTCCGAACCACAAAAG  
CCGAGCCGATAAATCCTAAGCCGAGCCTAACTTTAGCCGTAACCATCAGTCACGGCTCCCGGGCTAATTCATTTGAA  
CCGAATCATAATCAACGGTTTAGATCAAACCTCAAACAATCTAACGGCAACATAGACGCGTCCGTGAGCTAAAAAGA  
GTGTGAAAGCCAGGTCACCATAGCATTGTCTCTCCAGATTTTTTATTTGGGAAATAATAGAAGAAATAGAAAAAA  
TAAAAGAGTGAGAAAAATCGTAGAGCTATATATTCGCACATGTACTCGTTTCGCTTTTCCTTAGTGTTAGCTGCTGCC  
GCTGTTGTTTCTCCTCCATTTCTCTATCTTTCTCTCTCGCTGCTTCTCGAATCTTCTGTATCATCTTCTTCTTCTTC

AAG**GT**GAGTCTCTAGATCCGTTTCGCTTGATTTTGGCTGCTCGTTAGTCGTTATTGTTGATTCTCTATGCCGATTTTCGC  
TAGATCTGTTTAGCATGCGTTGTGGTTTTATGAGAAAATCTTTGTTTTGGGGTTGCTTGTATGTGATTTCGATCCG  
TGCTTGTGGATCGATCTGAGCTAATTCTTAAGGTTTATGTGTTAGATCTATGGAGTTTGAGGATTCTTCTCGCTTC  
TGTCGATCTCTCGCTGTTATTTTTGTTTTTTTCAGTGAAGTGAAGTTGTTTAGTTCGAAATGACTTCGTGTATGCTC  
GATTGATCTGGTTTTAATCTTCGATCTGTTAGGTGTTGATGTTTACAAGTGAATTCTAGTGTCTCTCGTTGAGATC  
TGTGAAGTTTGAACCTAGTTTTCTCAATAATCAACATATGAAGCGATGTTTGAAGTTTCAATAAACGCTGCTAATCTT  
CGAAACTAAGTTGTGATCTGATTTCGTGTTTACTTTCATGAGCTTATCCAATTCATTTTCGTTTTCAATTTACTTTTTT  
TTAGTGAAC**Catg**ggcgcaagttagcagaatctgcaatggtgtgcagaaacccatctcttatctccaatctctcgaaat  
ccagtcaacgcaaatctcccttatcggtttctctgaagacgcagcagcatccacgagcttatccgatttctgctgctg  
tggggattgaagaagagtgggatgacgtaattggctctgagcttctgctcttaaggatcatgtctctctgtttccac  
ggcgtgc**ATGGGGGAAGCGGTGATCGCCGAAGTATCGACTCAACTATCAGAGGTAGTTGGCGTCATCGAGCGCCATC**  
**TCGAACCGACGTTGCTGGCCGTACATTTGTACGGCTCCGCAGTGGATGGCGGCCTGAAGCCACACAGTGATATTGAT**  
**TTGCTGGTTACGGTGACCGTAAGGCTTGTGAAACAACCGGGCAGCTTTGATCAACGACCTTTTGAAACTTCGGC**  
**TTCCCTGGAGAGAGCGAGATTCTCCGCGCTGTAGAAGTACCATTGTTGTGCACGACGACATCATTCCGTGGCGTT**  
**ATCCAGCTAAGCGCGAACTGCAATTTGGAGAATGGCAGCGCAATGACATTCTTGCAGGTATCTTCGAGCCAGCCAGC**  
**ATCGACATTGATCTGGCTATCTTGGCTGACAAAAGCAAGAGAACATAGCGTTGCCTTGGTAGGTCCAGCGGGCGGAGGA**  
**ACTCTTTGATCCGGTTCCTGAACAGGATCTATTTGAGGCGCTAAATGAAACCTTAACGCTATGGAACCTCGCCCGCG**  
**ACTGGGCTGGCGATGAGCGAAATGTAGTGCTTACGTTGTCCCGCATTTGGTACAGCGCAGTAACCGGCAAAATCGCG**  
**CCGAAGGATGTCGCTGCCGACTGGGCAATGGAGCGCCTGCCGGCCAGTATCAGCCCGTCATACTTGAAGCTAGACA**  
**GGCTTATCTTGGACAAGAAGAAGATCGCTTGGCCTCGCGCGCAGATCAGTTGGAAGAATTTGTCCACTACGTGAAAG**  
**GCGAGATACCAAGGTAGTCGGCAAA**TAA**GGATCAATTCCG**atcggttcaaacatttggcaataaagtttcttaaga  
ttgaatcctggttgcgggtcttgcgatgattatcatataatctggttgaattacgtaagcatgtaataattaacat  
gtaatgcatgacggtatattatgagatgggttttatgattagagtcccgaattatacatttaatacgcgatagaaa  
acaaaatatagcgcgcaaaactaggataaattatcgcgcgcggtgtcatctatgttactagatc 3'

### LbCas12a expression cassette

*Medicago truncatula* ubiquitin 2 promoter (*italic*); GenBank accession # AC174341.8, region 40059..41649

The nuclear localization sequence (**NLS**) is highlighted

### LbCas12a in UPPER CASE

T-Mt.AC145767.28 in lower case, underlined; GenBank accession # AC145767, region 93536..94035

ACTGTTAATAATTTTTAAACGTCAGCGCACTAAAAAACGAAAAGACGGACACGTGAAAATAAAAAACACACTAG  
TTTTATGACGCAATACTATTTTACTTATGATTTGGGTACATTAGACAAAACCGTGAAAGAGATGTATCAGCTATGAAA  
CCTGTATACTTCAATACAGAGACGTACTIONATATCGGATACGTACGCACGAAGTATCATATTAATTTAATTTTT  
AATAAATATTTTATCGGATACTTATGTGATACTCTACATATACACAAGGATATTTCTAAGATACTTTATAGATACGT  
ATCCTAGAAAAACATGAAGAGTAAAAAGTGAGACAATGTTGTAAAAATTCATTATAAATGTATATGATTCAATTTT  
AGATATGCATCAGTATAATTGATTCTCGATGAAACACTTAAAATTATATTTCTTGTGGAAGAACGTAGCGAGAGAGG  
TGATTAGTTAGACAACATTAATAAAATTAATGTTAAGTTCTTTAATGATGTTTCTCTCAATATCACATCATATG  
AAAATGTAATATGATTTATAAGAAAATTTTTAAAAAATTTATTTAATAATCACATGTACTATTTTTAAAAATTTG  
ATCTTTTATAATAATAACAATAATAAAGAGTAATCAGTGTTAATTTTTCTTCAAATATAAGTTTTATTATAAATCATT  
GTTAACGTATCATAAGTCATTACCGTATCGTATCTTAATTTTTTTTTAAAAACCGCTAATTCACGTACCCGTATTGT  
ATTGTACCCGCACCTGTATCACAATCGATCTTAGTTAGAAGAATTGTCTCGAGGCGGTGCAAGACAGCATATAATAG  
ACGTGGACTCTCTTATAACAAACGTTGTCGTATCACAAGGGTTAGGTAACAAGTCACAGTTTGTCCACGTGTCACG  
TTTTAATTGGAAGAGCTGCCGTTGGCGTAATATAACAGCCAATCGATTTTTGCTATAAAAGCAAATCAGGTAAACTA  
AACTTCTTCAATCTTTTCTTCCCATCGCTACAAAACCGGTTCTTTGGAAAAGAGATTCATTCAAACCTAGCACCC  
AATTCCGTTTCAAGGTATAATCTACTTTCTATTCTTCGATTATTTTTATTATTATTAGCTACTATCGTTAATCGATC  
TTTTCTTTTATCGCTCAAATTTAAATTCAATTAGGGTTTTGTTCTTTTCTTTCATCTGATTGAAATCCTTCTGAAT  
TGAACCGTTTACTTGATTTTACTGTTTATTGTATGATTTAATCCTTTGTTTTTCAAAGACAGTCTTTAGATTGTGAT

TAGGGGTTTCATATAAAATTTTTAGATTTGGATTTTTGTATTGTATGATTCAAAAAATACGTCCTTTAATTAGATTAGT  
ACATGGATATTTTTTACCCGATTTATTGATTGTCAGGGAGAATTTGATGAGCAAGTTTTTTTTGATGTCTGTTGTAAA  
TTGAATTGATTATAATTGCTGATCTGCTGCTTCCAGTTTTTCATAACCCATATTCTTTTAACTTGTGTACACACAA  
TGAAAAATTGGTGATTGATTCATTTGTTTTCTTTGTTTTGGATTATACAGGGTaccaaaa**ATGGCGGGATCTAAG**  
**AAGAGAAGAATTAACAAGAT**TCGAAGCTCGAGAAGTTCACCAACTGCTACTCGCTGAGCAAGACGCTGCGGTTCAA  
GGCGATCCCCGTGCGGAAGACCCAGGAGAACATCGACAACAAGCGGCTCCTGGTTCGAGGACGAGAAGCGCGCCGAGG  
ACTACAAGGGCGTCAAGAAGCTGCTGGACCGGTACTACCTCTCCTTCATCAACGACGCTCCTGCACTCGATCAAGCTC  
AAGAACCTGAACAACACTACATCTCGCTGTTCCGCAAGAAGACACGGACCGAGAAGGAGAACAAGGAGCTCGAGAACCT  
CGAGATCAACCTGCGCAAGGAGATCGCGAAGGCGTTCAAGGGCAACGAGGGGTACAAGAGCCTGTTCAAGAAAAGACA  
TCATCGAGACCATCCTGCCGGAGTTTCTGGACGACAAGGACGAGATCGCGCTGGTGAACCTCGTTCAACGGGTTTACC  
ACGGCCTTACCAGGTTTTTTTCGACAACCGGGGAGAACATGTTTCAGCGAGGAGGCCAAGTCGACCAGCATCGCCTTCCG  
GTGCATCAACGAGAACCTCACCCGCTACATCAGCAACATGGACATCTTCGAGAAGGTGGACGCCATCTTCGACAAGC  
ACGAGGTCCAGGAGATCAAGGAAAAGATCCTGAACTCGGACTACGACGTGGAAGACTTCTTTGAGGGCGAGTTCTTC  
AACTTCGTCTCACCCAGGAGGGCATCGACGTCTACAACGCCATCATCGGCGGCTTCGTGACGGAGAGCGGGCAGAA  
GATCAAGGGCCTCAACGAGTACATCAACCTCTACAACCAGAAGACTAAGCAGAAGCTCCCGAAGTTCAAGCCGCTGT  
ACAAGCAAGTCTGAGCGACCGGGAGTCCCTCTCGTTCTACGGCGAGGGCTACACGAGCGACGAGGAGGTGCTGGAG  
GTGTTCCGCAACACGCTGAACAAGAACAGCGAGATCTTCAGCTCGATCAAGAAACTCGAGAAGCTGTTCAAGAACTT  
CGACGAGTACAGCAGCGCCGGCATCTTCGTCAAGAACGGGCCCGGATCAGCACCATCAGCAAGGACATCTTCGGGG  
AGTGGAACGTGATCCGCGACAAGTGGAACGCCGAGTACGACGACATCCACCTCAAGAAAAAGGCGGTGGTACGGAG  
AAGTACGAGGACGACCGCCGGAAGTCTTCAAGAAAATCGGGAGCTTCAGCCTCGAGCAGCTCCAGGAGTACGGGA  
CGCCGACCTGAGCGTGGTGGAGAAGCTCAAGGAGATCATCATCCAGAAGGTGACGAGATCTACAAGGTCTACGGCT  
CGAGCGAGAAGCTGTTTCGACGCGGACTTTCGTGCTGGAGAAGTCCCTCAAGAAGAACGACGCCGTTGGTGGCCATCATG  
AAGGATCTGCTCGACAGCGTGAAGTCTTCGAGAACTACATCAAGGCATTCTTTGGGGAGGGCAAGGAGACGAACCG  
GGACGAGTCTTTCTACGGGGACTTTCGTGCTCGCGTACGACATCTCCTGAAGGTGACCCACATCTACGACGCGATCC  
GGAACACTACGTACGCAGAAGCCCTACAGCAAGGACAAGTTCAAGCTCTACTTCCAGAACC CGCAGTTTATGGGCGGG  
TGGGACAAGGACAAGGAGACCGACTACCGGGCCACGATCCTGCGGTACGGGTCCAAGTACTACCTCGCCATCATGGA  
CAAGAAGTACGCCAAGTGCCTCCAGAAGATTGACAAGGACGACGTGAACGGGAACACTACGAGAAGATCAACTACAAGC  
TCCTCCCGGGGCCCAACAAGATGCTGCCGAAGGTGTTCTTCAGCAAGAAGTGGATGGCCTACTACAACCCCTCGGAG  
GACATCCAGAAGATATAACAAGAACGGCACGTTCAAAAAGGGGGACATGTTCAACCTGAACGACTGCCACAAGCTGAT  
CGACTTTTTCAAGGACAGCATCAGCCGCTACCCGAAGTGGTCGAACGCCTACGACTTCAACTTCTCGGAGACGGAGA  
AGTACAAGGACATTGCGGGCTTCTACCGGGAGGTGGAGGAGCAGGGCTACAAGGTCTCCTTCGAGAGCGCCTCCAAG  
AAAGAGGTGGACAAGCTCGTGGAGGAGGGCAAGCTGTACATGTTCCAGATCTACAACAAGGACTTCTCGGACAAGTC  
GCACGGCACCCCGAACCTCCACACGATGTACTTCAAGCTGCTGTTTCGACGAGAACAACCACGGGCAGATCCGCTCA  
GCGGCGGGGCGGAGCTGTTTCATGCGCCGCGCTCCCTCAAGAAGGAGGAGCTGGTTCGTGCACCCCGCCAACCTCCCCG  
ATCGCGAACAAGAACCCCGACAACCCCAAGAAGACAACCACCTCTCGTACGACGTCTACAAGGACAAGCGGTTCTC  
GGAGGACCAGTACGAGCTGCACATCCCGATCGCCATCAACAAGTGCCCAAGAACATCTTCAAGATCAACACCGAGG  
TGCGGGTGCTGCTCAAGCACGACGACAACCCCTACGTATCGGGATCGACCGCGGCGAGCGGAACCTGCTCTACATC  
GTGGTTCGTGGACGGGAAGGGGAACATCGTGGAGCAGTACAGCCTGAACGAGATCATCAACAACCTTCAACGGCATCCG  
CATCAAGACGGACTACCACAGCCTCCTGGACAAGAAGGAGAAGGAGCGGTTTCGAGGCGCGGCAGAACTGGACCTCCA  
TCGAGAACATCAAGGAGCTGAAGGCCGGCTACATCAGCCAGGTGCTGCACAAGATCTGCGAGCTCGTGGAGAAGTAC  
GACGCGGTGATCGCGCTGGAGGACTTGAACAGCGGGTTCAAGAACTCCCGGTCAAGGTGAGAAGCAGGTCTACCA  
GAAGTTCGAGAAGATGCTGATCGACAAGCTCAACTACATGGTGGACAAGAAGTCCAACCCCTGCGCCACCGGCGGG  
CCCTCAAGGGCTACCAGATCACCAACAAGTTTCAGTCCCTTCAAGTTCGATGTCTACGCAGAACGGGTTTCAATTTCTAC  
ATCCCGGCGTGGCTCACCAGCAAGATCGACCCGAGCAGGGCTTCGTCAACCTCCTGAAGACCAAGTACACCAGCAT  
CGCGGACAGCAAGAAGTTCATCTCCTCGTTTCGACCGCATCATGTACGTCCCGGAGGAAGACCTGTTTCGAGTTCCGCC  
TCGACTACAAGAACTTCTCCCGGACGGACGCCGACTACATCAAAAAGTGAAGCTCTACAGCTACGGCAACCGGATC  
CGCATCTTCGCAACCCCAAGAAGAACAATGTGTTTCGACTGGGAGGAGGTGTGCCTGACGAGCGCCTACAAGGAGCT  
CTTCAACAAGTACGGCATCAACTACCAGCAAGGGGACATCCGCGCGCTGCTCTGCGAGCAGTCCGACAAGGCGTTCT  
ACTCGTTCGTTTCATGGCCCTGATGAGCCTCATGCTCCAGATGCGCAACAGCATCACCGGCCGGACGGACGTGGACTTC

**CTGATCAGCCCGGTCAAGAACAGCGACGGCATTCTTCTACGACAGCCGGAACACTACGAGGCCAGGAGAACGCCATCCT  
CCCCAAGAACGCCGACGCGAACGGCGCCTACAACATCGCGCGGAAGGTGCTGTGGGCCATCGGCCAGTTTAAAAAGG  
CGGAGGACGAGAAGCTGGACAAGGTCAAGATCGCCATCAGCAACAAGGAGTGGCTCGAGTACGCGCAGACGAGCGTG  
AAGCACGGATCTAAGAAGAGAAGAATTAAACAAGAT**TGATTAAttaatcatctgaaactgttcaccatgcatgcaat  
cttgtgaaatatatgggttttaattagacttcaatcttatggttggtattgtactaataaaaagcatgtcatgttattt  
tcatttgattttatctgtactttgggtttggttgaagaataaagatgagccttgctatgcatgcatgcatgccatcgat  
tatcaggggtttcctttttctttctggcttcccatcaatttgggtgtgaattagtgtgtgtgatataattatattatg  
ctatttatgaaataaattggttggttatatttgatctacaatctacatacatgtgatttttatcaacaaaatatctcg  
ggaaacaatacctttttggttagcaaaattcaaataatactattttaataaatacaagttaaccaataccttattca  
agttggaggggtctcaacaagcaaaagaattcaagttgtaatagaacttcggttaatagataaaaagaattcgcattt  
aaaa

**Soybean U6 promoter+DT5.1 gRNA cassette (DT5.1 target site in bold, CRSPR RNA is highlighted):**  
CGATAAAAATGTTTTAAACGATATATATTATAAAAAAAACGTTTCAAAAATAAATACAAAATGTTTTTAAATATA  
TATAATTTAACTCATTAAAGAAAATAAAAATGCAAGTGCAGGTGACAAGACAAGCTAAAAGTTGCAAAAGAAATGGCA  
GGGCTATAAGGCTCACCTACTCCTGGATTTACCAAATTTTGGTTCGTCCCTATACTCGAAAAATAAAACAAAATAAA  
TTTCAGTATCTTCGTTTTTGTATGCTTTGACTGTGAGGCGAGGCCAACTTTCTTCTTCTGTCTGAGATGAATTTTGT  
TTGCCTCCTGTGAAGGATGTATCATTCAAAGTGAATGTTTTGCAACTGCCAGTAGTCCCACATCGACCAAATATTCT  
TATTACAGTGTGTTTATATAGCACCTGGAGAAGGAATGGGTGtcc**TAATTTCTACTAAGTGTAGATGACTTTAGCT  
CCTCTGTTGAGTCTAATTTCTACTAAGTGTAGAT**TTTTTTT

**Soybean DT5.1 target sequence** (GenBank accession no. NC\_038242.2, region 47935988..47938053):  
The **DT5.1** Cas12A target site (reversed orientation) is marked in bold, the **PAM** is highlighted.

TCTTATTATCTTTAATGGAATTACAATTTTTCCATATCTAAGATCTTGATTAAAGATTTTAAAGTTCAATCTCAAAC  
TAATGGCATGACACTTAACTTAATCAAGTGAATAAGGTTAACCTACACATTCTGCAGAAGATGTGCACTGCGTGAT  
TTTGTGTTTTTACATAACATGAATATGGTCCACCTTTTTGTATGACAAATGCAAAGACAATGGTAATAGATGCAC  
CGTAGGGCCATGAAGCCAATCAATCTCAGAAGTGTCCGCAATTTTCTCGACTAGTGAATATATAGAGACATTGCATC  
CACTATATACTTCAATTGCTTACAAAATATGCATGGAAAGCTTTTCTAGCTATATTTTTGTGCAATATTATGATGAG  
AACAAATTAACGAAAAGAAGTAGTCACACATGTCAAAAAGAAGCGAAGAAAAGTTAAAAATCCATTAGGGGCCAAGT  
GTATTTAAGAGCTCTATTAAGCATTCCAAATTTCTTTTGACAAATTAATCAAGCAAGAAAATAAATAAATAAACATC  
AATTCTCATATTATAAATTTAAGTTATTGTGCTTCAAACTATTTAATCATATATCGTTCTCATTTTTTTGACACACG  
TGTTATGAATTATGAGTTTTCTTTCTTTAAGATATGCTTTTTATGAAGAGTTTTGATGGGAAAGGAAAAACAAGATAAA  
TTTTTCGTTTTTAATAAATACTTAAATTTCTTCAATCAATATTAATAAATAAATAAATTTTTAAATTCATTACTGTTTT  
TTAATTGAAAACCTTCAAACATTTATATCTTTATACTTTACGTTATATTTTTTATTACTAGTAGAATAGTTTTCCCT  
TTTAAATATTTATAATTTATTTTTATTGCCTAAAAATTATTTATTTTTTATGTTTTACATATGTGTAAGATCATC  
CAATGAGCAAGATACTTACAAGTTACAAGCTCGTGTAACTCAAAATGCATGTATTGAACTTTTATTATTATTATT  
ATTTCTTTCTTCGTTCTGTCTTTA**GACTTTAGCTCCTCTGTTGAGTCTAAA**CAACACTACATCTGACCTAAGAATG  
AGCCCCACCCATGAGCATTGTTTATGACAAACCCTAATAAATACATTAAGTATTAGATAATACAATGTTAGTACAT  
ACAGAGAAACGTAGCCATCATGTAATAAATTTGTGTCTTCATTATCGAATGAGAGTATTTTTAGAAATATTCTCATT  
TTCATTAAGTCACATAACTTCTCTTAAATTAATAAATTAGTTTTATTTTTATTATAATTTTCAATTTCTTTTCAAAT  
GTTACCTCTTAAATTTATTTTCATGCATGCAAACGATGCGCATTTAATCATCAGTTATTGAGAAGTCAAGAAATGCA  
AACCTCTCTATAAAAAAAATTTGCAAACCTATGATCAATAATTTAAGAGTTTAACTTTTATTTCATATTTTGACGGTA  
AAAAGAAAATCCTGTTGTTTCATATTTAAATGATTATTACAAAACCAACATTTGTTCATATATAGTATGACATGATA  
ATTTATAAGGCTTTTTGTTTACTAAAGATATTCCCAACATTTCTCATGCATGTTTAGATTACCCTTTGGTATCC  
TTCAACTTACTTTTTAGATCAACTCATATTATACCAAAGTCTGATGATAAAAAATATTATACCAAACCTCAAGTTTATA  
ATATACTTTTTTAATTCAAACCTTACATTTACAAATTTTAACTCAAACATATACTATGTCAGATTTTTATTGTTGATAA  
TTTATAATTAGGTAATAAATAAATAATGTAAGAATTACAATGTGAATGCATTCTAATTAATTTATATTTCAAATTT  
TTACAATAAATTTCTATTTATAATTTTACTATAAAAAACGTTTTAAACAGATGAAAATTTTTTATTGCAAAAAGAG  
ACGACGATCCTAACATTTGTCAACAAAGTCCCTTTTTAAAGTTCACACTGAGCAGGTGTGAGGGTGAGAACAGGGCTC  
TACTGTAACATATATCGAACGGCGGACAGAACTCTCGCATTTAAACATACATACTCATCAAATCA



### Supplementary 3: Long-read sequencing the site-specific integration locations from T-circle vector transformation.

We analyzed three SSI events with PacBio Hi-Fi sequencing for long-reads to verify Illumina sequence assembly.

The plasmid 1 was re-transformed into soybean meristem explants as described in Materials and Method. Approximately 5000 soybean explants were used for transformation. One hundred eighty-four leaf samples were directly harvested from tissue culture containers, extracted for genomic DNA and analyzed for the DT5.1 targeted integration with Illumina sequence assembly. In total, 49 SSI events (26.6%) were identified, of which 10 (5.4%) were single copy SSI events with different DT5.1 target site junctions.

Selected events were transferred into soil plugs in a growth chamber to harvest enough leaf tissue for PacBio DNA extraction. Approximately one gram of leaf tissue was pulverized in liquid nitrogen and extracted using a CTAB-based protocol (Aboul-Maaty & Oraby, 2019) with an additional step of phenol extraction before precipitation. The genomic DNA was rinsed with 70% ethanol, air-dried and resuspended in water.

The extracted DNA samples were prepared for PacBio Hi-Fi sequencing libraries using SMRTbell prep kit 3.0 according to manufacturer instruction and loaded into PacBio REVIIO system for long-read sequencing (<https://www.pacb.com/revio/>). The Hi-Fi reads with approximately 19 kb in length on average of the genomic data were aligned to the two directional reference sequences of the expected DT5.1 target integration (**Supplementary 2, Fig. S5**) across the 14 kb target regions from the T-circle re-linearization using CLC Genomics Workbench (<https://www.Qiagen.com>).

Three events were verified by the PacBio long-read sequencing as expected with the Illumina sequencing assembly. The event #9 and #33 are **single copy SSI** at the DT5.1 location, while the event #83 has **two copy insertions** with one SSI at the DT5.1 location and the other random integration in chromosome 17. Two long-reads of the event #9, a single long-read of the event #33 and a single long-read of the event #83 covered the entire 14 kb target region at the chromosome 6 DT5.1 target location (**Supplementary 3, S1**). The detailed chromosome/linearized T-circle junctions and the LB/RB junction inside the *Arabidopsis actin 7* intron have been revealed in **Supplementary 3, S2, S3 and S4, respectively**. All junctions have deletions which are consistent with previous observations using Illumina sequence assembly.

We also analyzed the co-transformed T-DNA copy at the chromosome 17 location of the event #83 (**Supplementary 3, S4, S5, S6**). Both RB and LB junction have deletions. An 89 bp reversed sequence derived from the adjacent flank of the chromosome 17 is re-inserted between the RB junctions.

### References:

Aboul-Maaty, N.A.F., Oraby, H.A.S. (2019) Extraction of high-quality genomic DNA from different plant orders applying a modified CTAB-based method. Bull Natl Res Cent 43, 25. <https://doi.org/10.1186/s42269-019-0066-1>

### Acknowledgements

We are grateful to Drs. Ashok Shrawat and Kevin Lutke for assistance in soybean transformation, Dr. Zijin Du for PacBio Hi-Fi library preparation and sequencing, Dr. Linda Rymarquis for Illumina sequence analyses of all target events and PacBio sequence alignments, and Drs. Jenn To, Ericka Havecker and Xuefeng Zhou for supporting this supplementary work.

# S1

## Mapping long-reads to DT5.1 target reference sequences at the chromosome 6 location

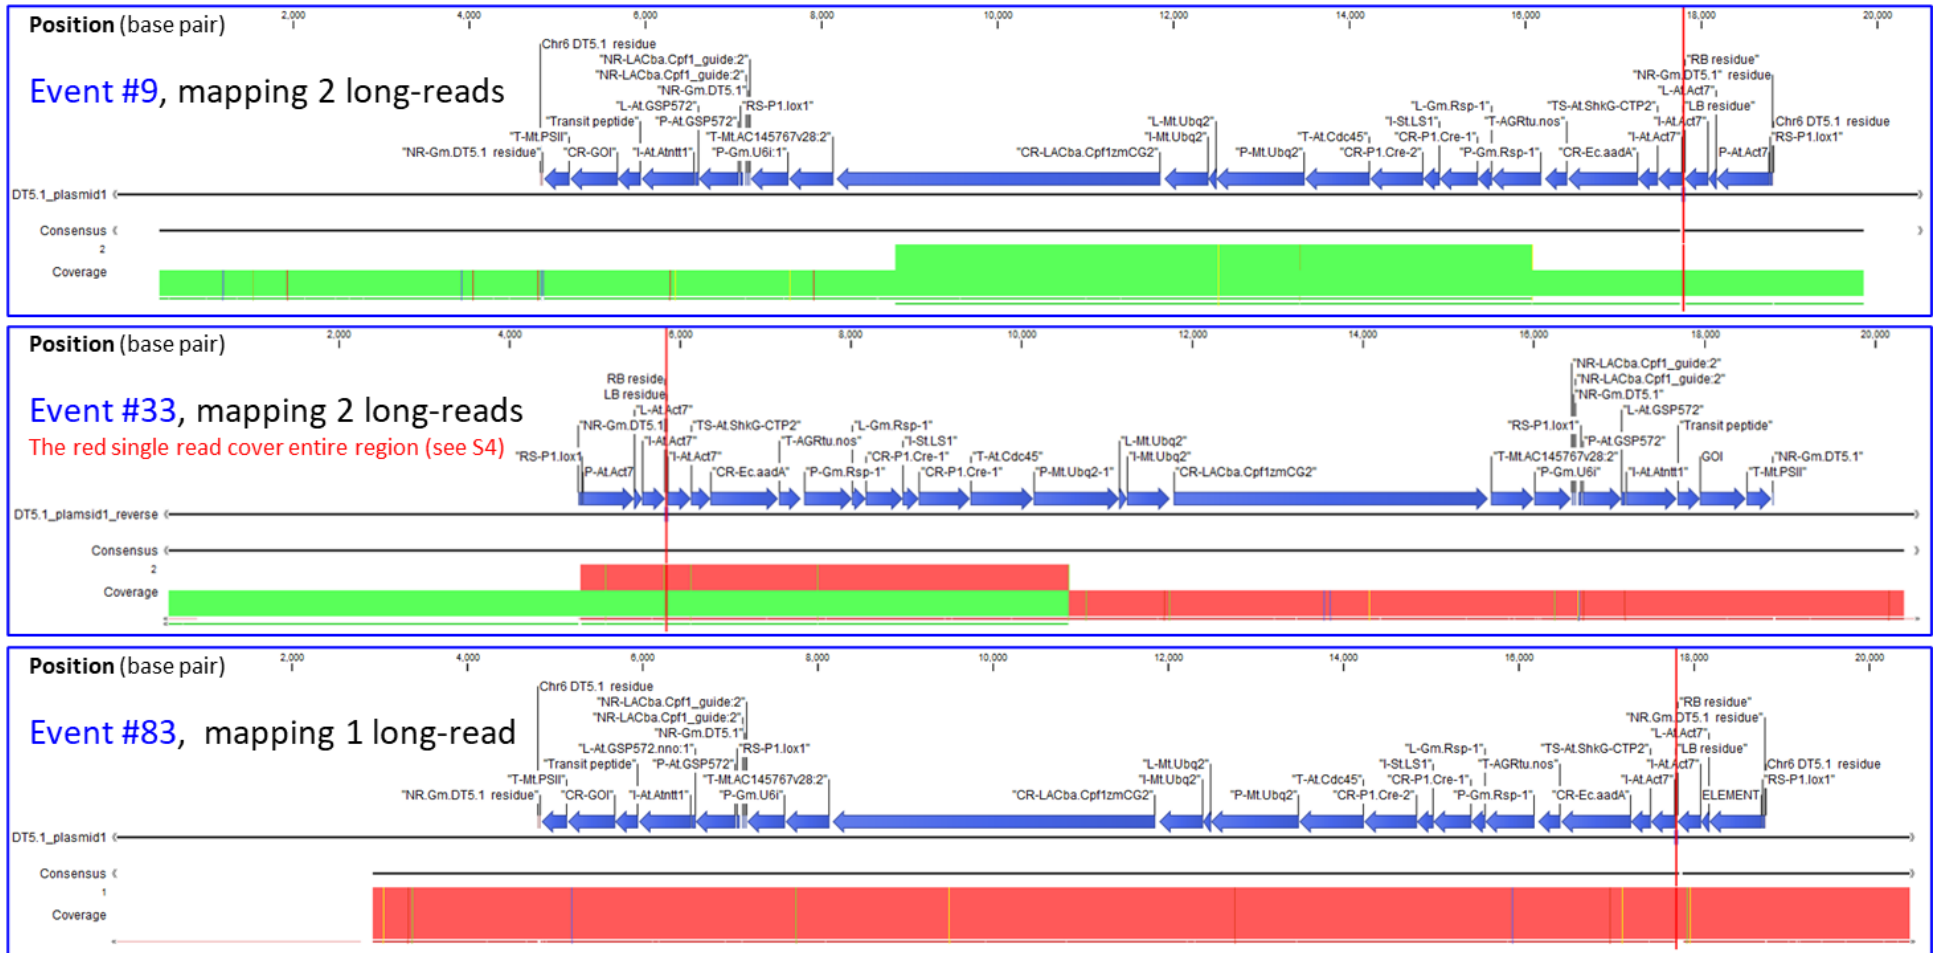

**Note:** LB/RB junction is indicated by a long vertical red line. Genetic elements are indicated in **Supplementary 2**. The vertical lines interrupting consensus sequences are SNPs or deletions.

# S2

## SSI event #9: DT5.1 target insert junction structures from PacBio Hi-Fi long-read sequencing

Two overlapped long-read mapping

Chromosome 6 and T-DNA  
DT5.1 cut site residue junction

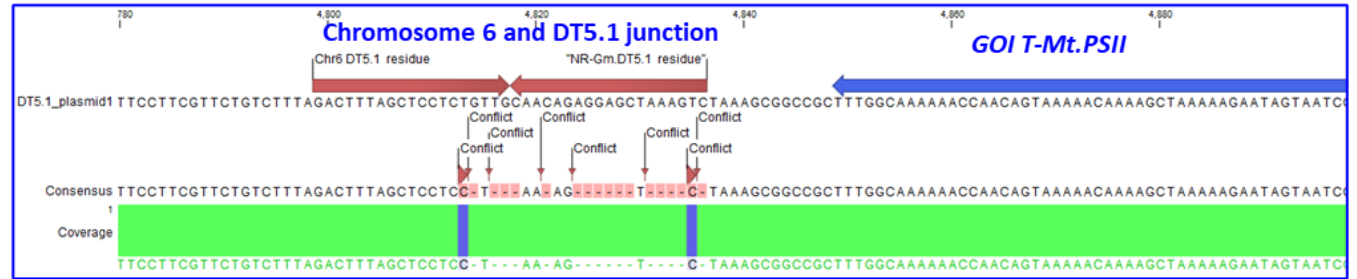

T-DNA left and right border  
residue junction inside the  
*Arabidopsis Act7* intron

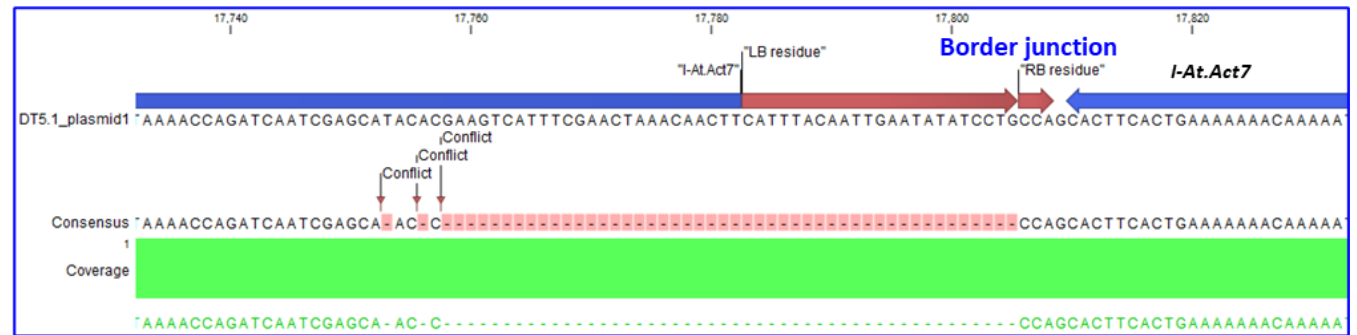

T-DNA and chromosome 6  
DT5.1 cut site residue junction

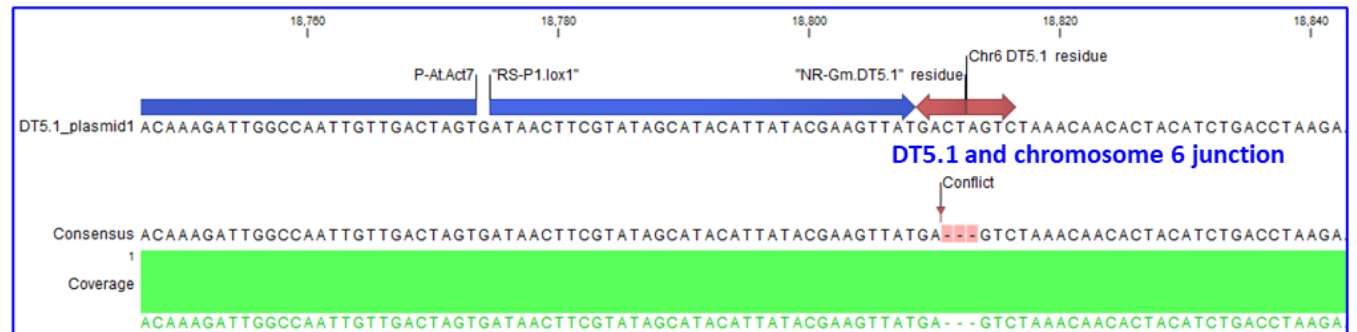

# S3

## SSI event #33 (reverse insert): DT5.1 target insert junction structures from PacBio Hi-Fi long-read sequencing

### Chromosome 6 and T-DNA DT5.1 cut site residue junction

**Note:** The red single long-read has covered the entire 14 kb target region (see S1). Its 5' end is not long enough to be aligned properly by the software. Adding some protection sequences between the DT5.1 cut site and the *loxP* site inside the T-DNA could have avoided the chewback in the *loxP* site.

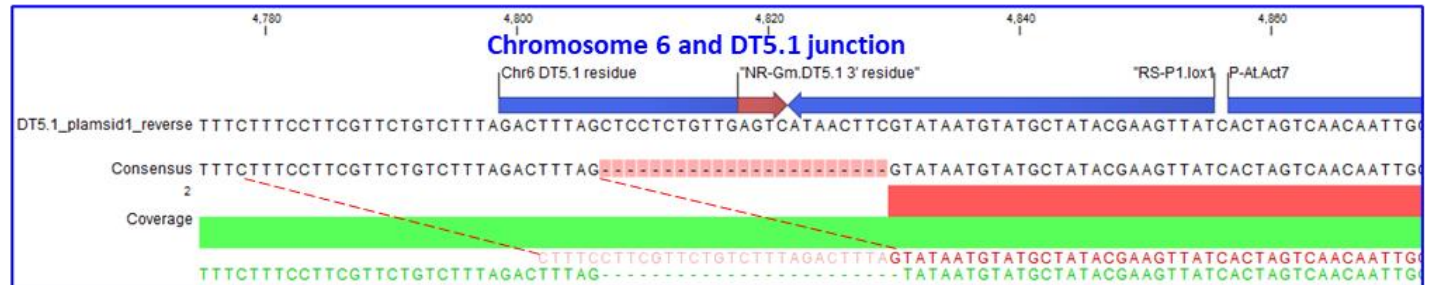

### T-DNA left and right border residue junction inside the *Arabidopsis Act7* intron

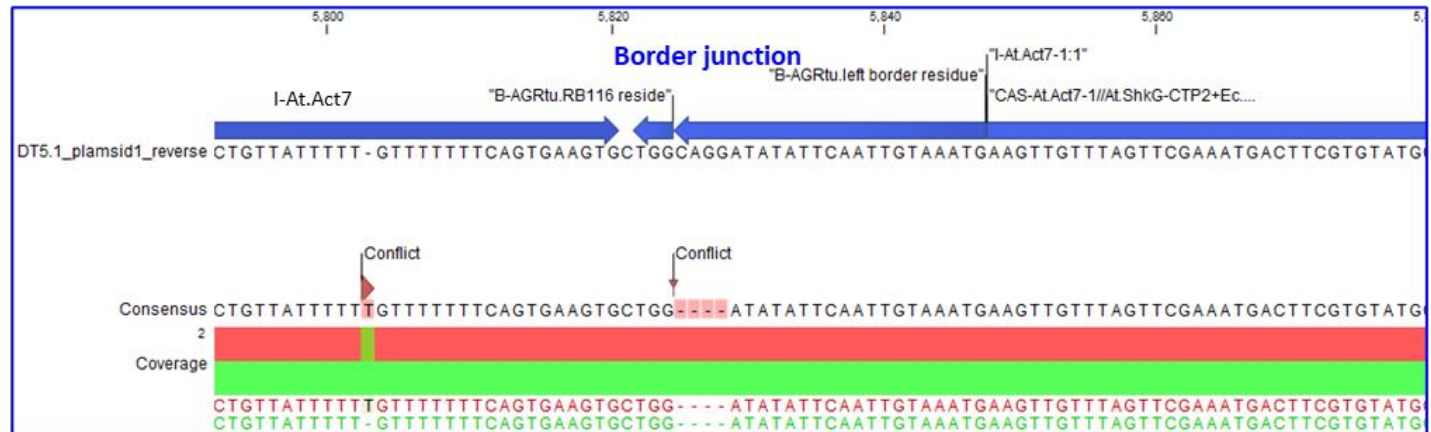

### T-DNA and chromosome 6 DT5.1 cut site residue junction

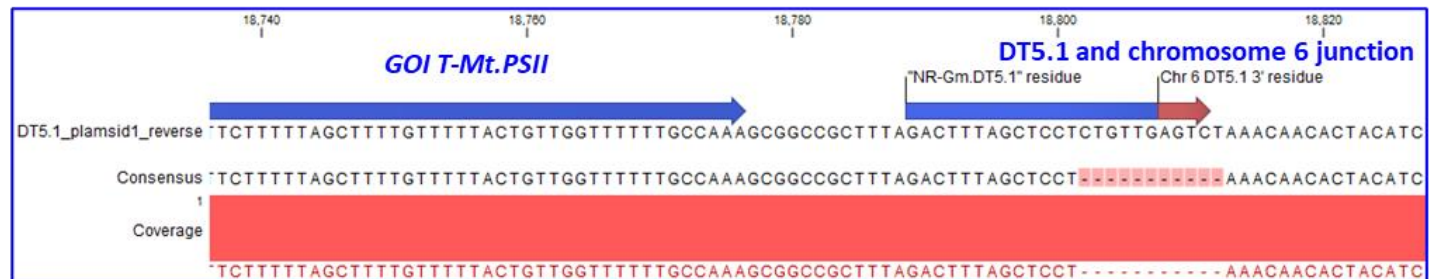

# S4

## SSI event #83: DT5.1 target insert junction structures from PacBio Hi-Fi long-read sequencing

The #83 plant is a two-copy event: one copy T-DNA is likely derived from a T-circle, re-linearized and site-specifically integrated at the Chr6 DT5.1 site, although we could not completely rule out the possibility of releasing the target sequence from a 2-copy tandem integration at the chromosome 17 by simultaneously cutting the DT5.1 sites inside the tandem T-DNA which occurred at rare frequency (see **Fig.1B**, **Supplementary 1** and **Supplementary 2, Fig. S6**); the other randomly integrated at the Chr17 without forming T-circle (see **S5** and **S6**). The SSI event at DT5.1 location can be segregated from the Chr17 insertion in T1 generation. The marker-free GOI seeds may be obtained by *Cre/loxP* autoexcision (Ye *et al.*, 2023).

Single long-read mapping

Chromosome 6 and T-DNA  
DT5.1 cut site residue junction

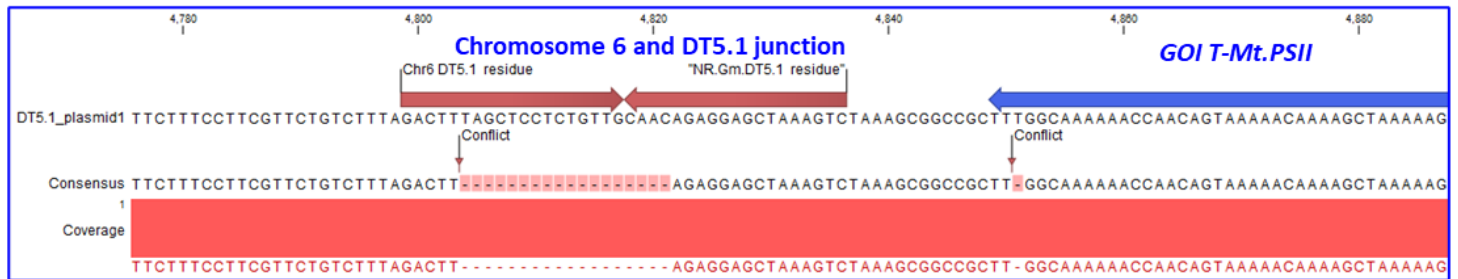

T-DNA left and right border  
residue junction inside the  
*Arabidopsis Act7* intron

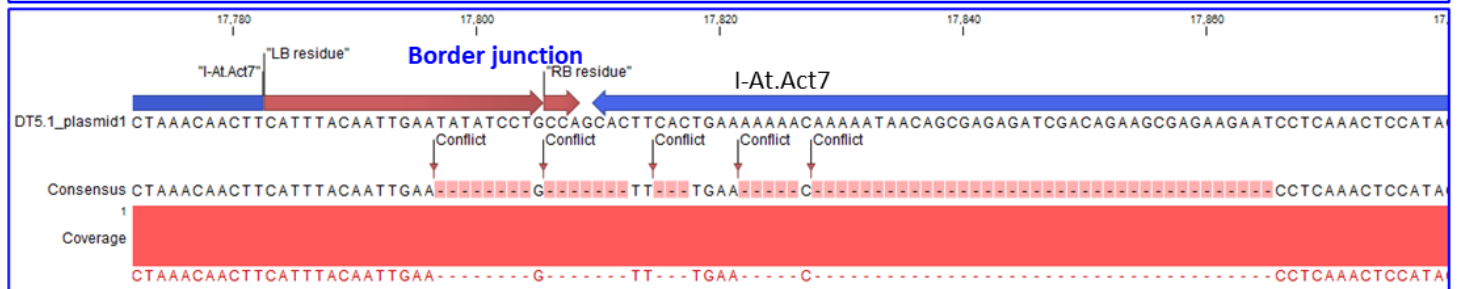

T-DNA and chromosome 6  
DT5.1 cut site residue junction

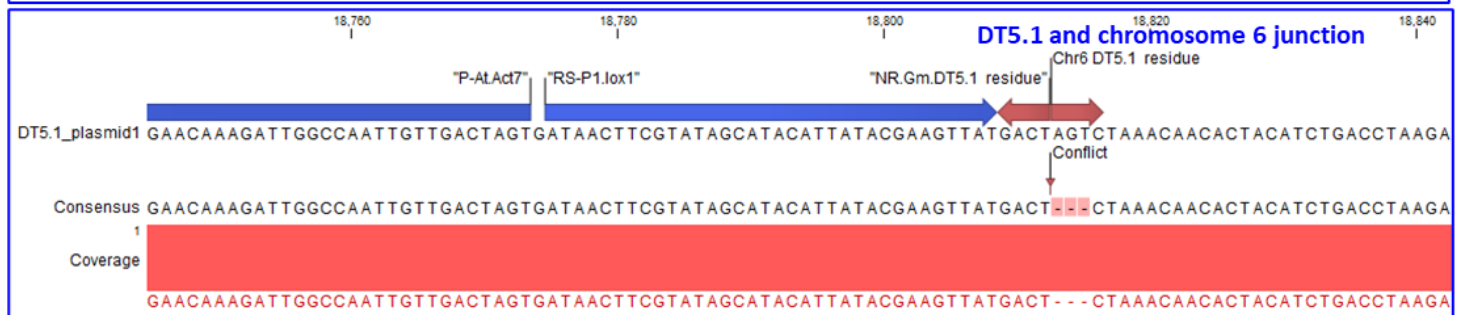



# S5

## Characterization of the co-transformed T-DNA copy in chromosome 17 of the SSI event # 83

The soybean transgenic plant #83 is a two-copy transgenic event: one copy SSI at the chromosome 6 DT5.1 site (see **S4**), the other integrated at soybean phospholipase A1-I beta2 mRNA 5' leader sequence (LOC100819591, GenBank # [XM\\_003549891](https://www.ncbi.nlm.nih.gov/nuccore/XM_003549891)). This region sequence is identical between soybean cultivar Williams 82 and A3555. The three junctions are detailed in **S6**.

### The structure of the linear T-DNA integration in Chr 17

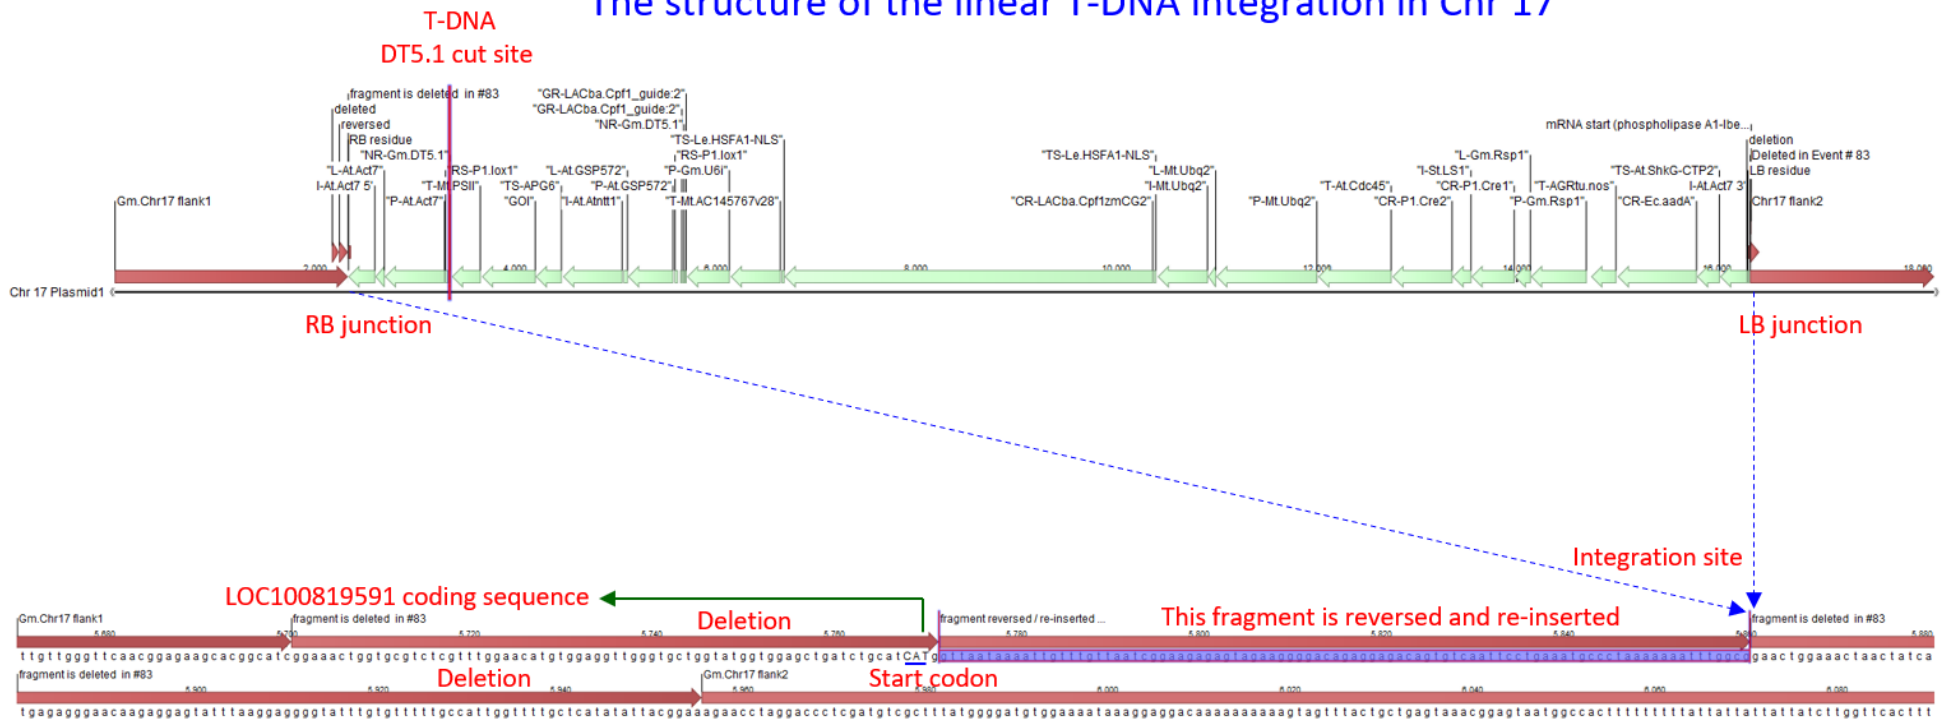

# S6

## Characterization of the co-transformed T-DNA copy in chromosome 17 of the SSI event # 83 (continued)

The detailed insertion junctions at *Glycine max* chromosome 17, GenBank accession # [CP126442](#)

### RB junction

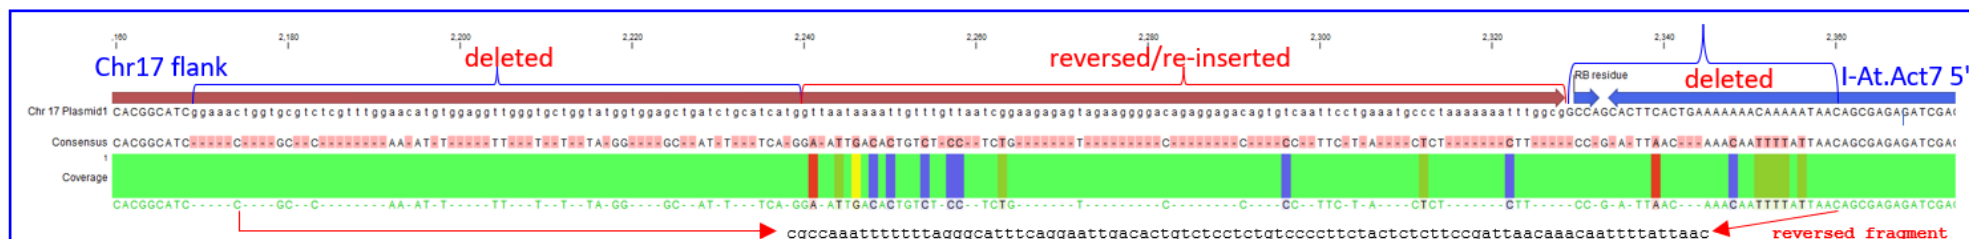

### T-DNA DT5.1 junction: the INDEL abolished the DT5.1 and *loxP* sites

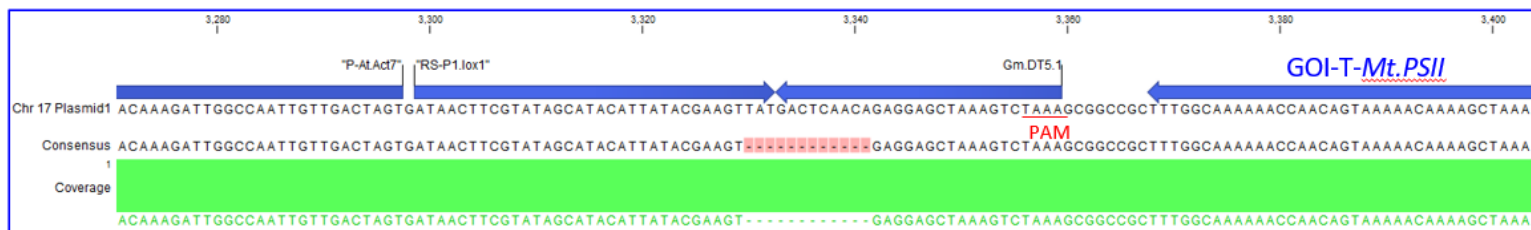

### LB junction: 95 bp chr17 flank deletion

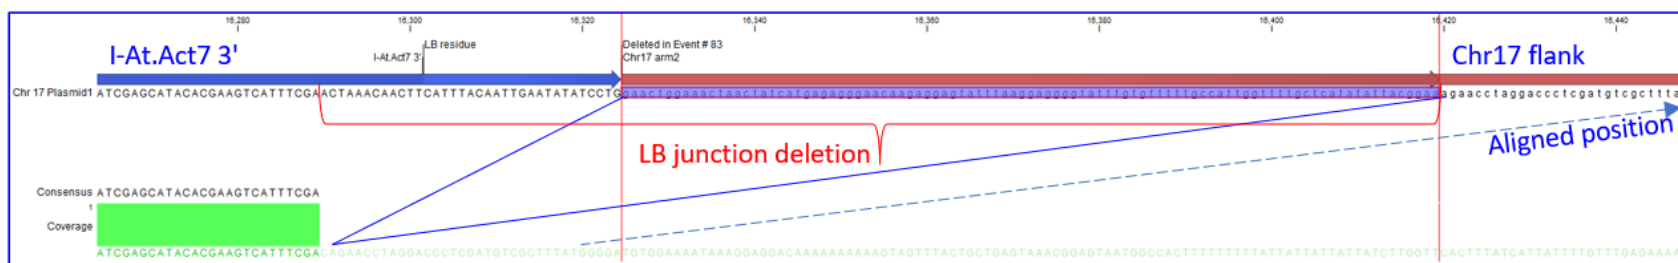

**Note for the T-DNA in soybean chromosome 17:** The linear T-DNA is randomly inserted into the soybean phospholipase A1-I beta2 mRNA 5' leader sequence. The RB junction has 71 bp genomic flank deletion, followed by 89 bp genomic flank reversion and further 32 bp T-DNA RB terminus chewback. The LB junction has 35 bp chewback in the T-DNA LB terminus and 95 bp deletion in the genomic flank. The T-DNA DT5.1 site is cut and imperfectly repaired with 9 bp deletion at the cut site which prevents further re-cutting by Cas12a nuclease.

## Supplementary 4

Junction analyses of 41 soybean site-specific integration events at DT5.1 from T-circle plasmids. Each event has two genomic insert junctions and one LB-RB junction inside the marker gene intron.

### Summary

Eleven out of 41 RB have intact RB residues while 41 LB residues had deletions at the RB-LB junctions from all 41 events (**S2, S5, S8, S11**), which is consistent with previous observations that RB is more conserved (Gelvin, 2021; Singer *et al.*, 2022). The 4 bp DT5.1 PAM-distal end back-to-back junctions had deletions with an average of 7.5 bp from 32 events (**S1, S7**), while the 19 bp DT5.1 PAM-proximal end back-to-back junctions had an average of 24 bp deletion from the same events (**3, S3, S9**). Sixteen junctions expecting to reconstitute the DT5.1 site from the forward orientation inserts of 8 events (**Fig. S4**) had an average of 31 bp deletions (**S4, S6, S10, S12**), indicating that a simple directional ligation between the two Cpf1 5' overhangs did not occur (Zetsche *et al.*, 2015). The largest deletions up to 339 bp are observed in the plasmid 2 with long border residues inside the *aadA* promoter intron (**S8, S11**), which is concordant with a further TF drop using the plasmid 2 and suggests that long residues inside the intron interfere the marker gene expression. The RB-LB junction from the plasmid 1 contained filler DNA of 7-37 bp at the gaps in 6 of total 27 events, which is common in T-DNA integration (Gelvin, 2021; Singer *et al.*, 2022).



**S1) Target events from the Plasmid 1 with short LB, reverse orientation insertions, chromosome linkages at *lox end* of T-DNA**

|          |          | ← Chr06                                                         | T-DNA         |           |                                                                       |                     |
|----------|----------|-----------------------------------------------------------------|---------------|-----------|-----------------------------------------------------------------------|---------------------|
|          |          |                                                                 | ← DTS.1       | DTS.1 →   | ← P1.lox1:1                                                           | P-At.Act7→          |
| INSERT # | Sample # | A T T C T T A G G T C A G A T G T A G T G T T G T T T A         | G A C T       | A G T C   | A T A A C T T C G T A T A A T G T A T G C T A T A C G A A G T T A T   | C A C T A G T C A A |
| 1        | #19-060  | A T T C T T A G G T C A G A T G T A G T G T T . . . . .         | . . . . .     | G T C     | A T A A C T T C G T A T A A T G T A T G C T A T A C G A A G T T A T   | C A C T A G T C A A |
| 1        | #19-068  | A T T C T T A G G T C A G A T G T A G T G T T G T T T . . . . . | . . . . .     | . . . . . | A C T T C G T A T A A T G T A T G C T A T A C G A A G T T A T         | C A C T A G T C A A |
| 1        | #19-069  | A T T C T T A G . . . . .                                       | . . . . .     | G T C     | A T A A C T T C G T A T A A T G T A T G C T A T A C G A A G T T A T   | C A C T A G T C A A |
| 1        | #19-070  | A T T C T T A G G T C A G A T G T A G T G T T G T T T A         | G . . . .     | A G T C   | A T A A C T T C G T A T A A T G T A T G C T A T A C G A A G T T A T   | C A C T A G T C A A |
| 1        | #19-073  | A T T C T T A G G T C A G A T G T A G T G T T G T T T A         | . . . . .     | . . . . . | A T A A C T T C G T A T A A T G T A T G C T A T A C G A A G T T A T   | C A C T A G T C A   |
| 1        | #19-074  | A T T C T T A G G T C A G A T G T A G T G T T G . . . . .       | . . . . .     | . . . . . | A A C T T C G T A T A A T G T A T G C T A T A C G A A G T T A T       | C A C T A G T C A A |
| 1        | #19-075  | A T T C T T A G G T C A G A T G T A G T G T T G T T T A         | G . . . .     | A G T C   | A T A A C T T C G T A T A A T G T A T G C T A T A C G A A G T T A T   | C A C T A G T C A A |
| 1        | #19-079  | A T T C T T A G G T C A G A T G T A G T G T T G T T T A         | G A C . . . . | T C       | A T A A C T T C G T A T A A T G T A T G C T A T A C G A A G T T A T   | C A C T A G T C A A |
| 1        | #19-084  | A T T C T T A G G T C A G A T G T A G T G T T G T T T A         | G . . . .     | A G T C   | A T A A C T T C G T A T A A T G T A T G C T A T A C G A A G T T A T   | C A C T A G T C A A |
| 1        | #19-095  | A T T C T T A G G T C A G A T G T A G T G T T G T T T A         | G . . . .     | A G T C   | A T A A C T T C G T A T A A T G T A T G C T A T A C G A A G T T A T   | C A C T A G T C A A |
| 1        | #19-097  | A T T C T T A G G T C A G A T G T A G T G T T . . . . .         | . . . . .     | . . . . . | A T A A C T T C G T A T A A T G T A T G C T A T A C G A A G T T A T   | C A C T A G T C A A |
| 1        | #19-098  | A T T C T T A G G T C A G A T G T A G T G T T G T T T A         | G . . . .     | . . . . . | C A T A A C T T C G T A T A A T G T A T G C T A T A C G A A G T T A T | C A C T A G T C A A |
| 1        | #19-099  | A T T C T T A G G T C A G A T G T A G T G T T G T T T A         | G . . . .     | A G T C   | A T A A C T T C G T A T A A T G T A T G C T A T A C G A A G T T A T   | C A C T A G T C A A |
| 1        | #19-101  | A T T C T T A G G T C A G A T G T A G T G T T G T T T A         | G . . . .     | A G T C   | A T A A C T T C G T A T A A T G T A T G C T A T A C G A A G T T A T   | C A C T A G T C A A |
| 2        | #19-065  | A T T C T T A G G T C A G A T G T A G T G T T G T T T A         | G A C . . . . | T C       | A T A A C T T C G T A T A A T G T A T G C T A T A C G A A G T T A T   | C A C T A G T C A A |
| 2        | #19-067  | A T T C T T A G G T C A G A T G T A . . . . .                   | . . . . .     | . . . . . | A A C T T C G T A T A A T G T A T G C T A T A C G A A G T T A T       | C A C T A G T C A A |
| 2        | #19-072  | A T T C T T A G G T C A G A T G T A G T G T T G T T T . . . . . | . . . . .     | A G T C   | A T A A C T T C G T A T A A T G T A T G C T A T A C G A A G T T A T   | C A C T A G T C A A |
| 2        | #19-087  | A T T C T T A G G T C A G A T G T A G T G T T G T T T A         | G . . . .     | A G T C   | A T A A C T T C G T A T A A T G T A T G C T A T A C G A A G T T A T   | C A C T A G T C A A |
| 2        | #19-088  | A T T C T T A G G T C A G A T G T A G T G T T G T T T A         | G . . . .     | A G T C   | A T A A C T T C G T A T A A T G T A T G C T A T A C G A A G T T A T   | C A C T A G T C A A |
| 2        | #19-089  | A T T C T T A G G T C A G A T G T A G T G T T G T T T A         | G . . . .     | A G T C   | A T A A C T T C G T A T A A T G T A T G C T A T A C G A A G T T A T   | C A C T A G T C A A |
| 2        | #19-106  | A T T C T T A G G T C A G A T G T A G T G T T G T T T A         | . . . . .     | A G T C   | A T A A C T T C G T A T A A T G T A T G C T A T A C G A A G T T A T   | C A C T A G T C A A |

■ = truncated lox  
 ■ = assignable to either end; suggests overlap of ends contributes to linking

## S2) Target events from the Plasmid 1 with short LB, reverse orientation insertions, linkages at RB-LB junctions

| MIDDLE LINKAGE: RB-LB junction |          | 27 bp border residue inside intron<br>RB (post-cut)                                                                                                   |              |
|--------------------------------|----------|-------------------------------------------------------------------------------------------------------------------------------------------------------|--------------|
| INSERT #                       | Sample # | I-At.Act7 5' --->                                                                                                                                     | I-At.Act7 3' |
|                                |          | T AT GGAGTTT GAGGATT CTTCT CGCTT CTGTCGATCTCTCGCTGTTATTTTTGTTTTTTTCAGT GAAAGT GCTGGCAGGATATA T TCAATTGTAAATGAAGTT GTTTAGTT CGAAAT GACTTCGTG           |              |
| 1                              | #19-060  | T AT GGAGTTT GAGGATT CTTCT CGCTT CTGTCGATCTCTCGCTGT <b>TATT</b> . . . . . CAATTGTAAATGAAGTT GTTTAGTT CGAAAT GACTTCGTG                                 |              |
| 1                              | #19-068  | T AT GGAGTTT GAGGATT CTTCT CGCTT CTGTCGATCTCTCGCTGTTATTTTTGTTTTTTTCAGT GAAAGT. . . . . AATTGTAAATGAAGTT GTTTAGTT CGAAAT GACTTCGTG                     |              |
| 1                              | #19-069  | T AT GGAGTTT GAGGATT CTTCT CGCTT CTGTCGATCTCTCGCTGTTATTTTTGTTTTTTTCAGT GAAAGTGC. . . . . <b>T</b> AAATGAAGTT GTTTAGTT CGAAAT GACTTCGTG                |              |
| 1                              | #19-070  | T AT GGAGTTT GAGGATT CTTCT CGC <b>CG</b> CTGTCGATCTCTCGCT. . . . . <b>TCTGTCAA</b> . . . . . TCGTG                                                    |              |
| 1                              | #19-073  | T AT GGAGTTT GAGGATT CTTCT CGCTT CTGTCGATCTCTCGCTGTTATTTTTGTTTTTTTCAGT GAAAGT GCTGG. . . <b>T</b> ATAT TCAATTGTAAATGAAGTT GTTTAGTT CGAAAT GACTTCGTG   |              |
| 1                              | #19-074  | T AT GGAGTTT GAGGATT CTTCT CGCTT CTGTCGATCTCTCGCTGTTATTTTTGTTTTTTTCAGT. . . . . TAAATGAAGTT GTTTAGTT CGAAAT GACTTCGTG                                 |              |
| 1                              | #19-075  | T AT GGAGTTT GAGGATT CTTCT CGCTT CTG <b>TCG</b> . . . . . <b>A</b> AAATGACTTCGTG                                                                      |              |
| 1                              | #19-079  | T AT GGAGTTT GAGGATT CTTCT CGCTT CTGTCGATCTCTCGCTGT <b>TATT</b> . . . . . CAATTGTAAATGAAGTT GTTTAGTT CGAAAT GACTTCGTG                                 |              |
| 1                              | #19-084  | T AT GGAGTTT GAGGATT CTTCT CGCTT CTGTCGATCTCTCGCTGTTATTTTTGTTTTTTTCAGT GAAAGTGC. . . . . <b>T</b> TCAATTGTAAATGAAGTT GTTTAGTT CGAAAT GACTTCGTG        |              |
| 1                              | #19-095  | T AT GGAGTTT GAGGATT CTTCT CGCTT CTGTCGATCTCTCGCTGTTATTTTT. . . . . <b>GTT</b> GTTTAGTT CGAAAT GACTTCGTG                                              |              |
| 1                              | #19-097  | T AT GGAGTTT GAGGATT CTTCT CGCTT CTGTCGATCTCTCGCTGTTATTTTTGTTTTTTTCAGT GAAAGT GCTGG <b>ACCCCG</b> AT TCAATTGTAAATGAAGTT GTTTAGTT CGAAAT GACTTCGTG     |              |
| 1                              | #19-098  | T AT GGAGTTT GAGGATT CTTCT CGCTT CTGTCGATCTCTCGCTGTTATTTTTGTTTTTTTCAGT GAAAGT GCT. . . <b>GG</b> ATATAT TCAATTGTAAATGAAGTT GTTTAGTT CGAAAT GACTTCGTG  |              |
| 1                              | #19-099  | T AT GGAGTTT GAGGATT CTTCT CGCTT CTGTCGATCT. . . . . <b>TCCAGCAAATCAAATCAAGATTCTAGATTGCATCC</b> . . . . . ATGACTTCGTG                                 |              |
| 1                              | #19-101  | T AT GGAGTTT GAGGATT CTTCT CGCTT CTGTCGATCTCTCGCTGTTATTTTTGTTTTTTTCAGT GAAAGTGC. . . . . AT TCAATTGTAAATGAAGTTG TTTAGTT CGAAAT GACTTCGTG              |              |
| 2                              | #19-065  | T AT GGAGTTT GAGGATT CTTCT CGCTT CTGTCGATCTCTCGCTGTTATTTTTGTTTTTTTCAGT GAAAGT GCTGG <b>TAATCTTATTTTGTTTTTTCAG</b> . TGAAGTTG TTTAGTT CGAAAT GACTTCGTG |              |
| 2                              | #19-067  | T AT GGAGTTT GAGGATT CTTCT CGCTT CTGTCGATCTCTCGCTGTTATTTTTGTTTTTTTCAGT GAAAGT GCTGG. . . . . TG                                                       |              |
| 2                              | #19-072  | T AT GGAGTTT GAGGATT CTTCT CGCTT CTGTCGATCTCTCGCTGTTATTTTTGTTTTTT. . . . . ATTGTAAATGAAGTTG TTTAGTT CGAAAT GACTTCGTG                                  |              |
| 2                              | #19-087  | T AT GGAGTTT GAGGATT CTTCT CGCTT CTGTCGATCTCTCGCTGTTATTTTTGTTTTTTTCAGT GAAAGT GCTGG. . . . TATAT TCAATTGTAAATGAAGTTG TTTAGTT CGAAAT GACTTCGTG         |              |
| 2                              | #19-088  | T AT GGAGTTT GAGGATT CTTCT CGCTT CTGTCGATCTCTCGCTGTTATTTTTGTTTTTTCA. . . . . <b>GT</b> AAATGAAGTTG TTTAGTT CGAAAT GACTTCGTG                           |              |
| 2                              | #19-089  | T AT GGAGTTT GAGGATT CTTCT CGCTT CTGTCGATCTCTCGCTGTTATTTTTGTTTTTTTCAGT GAA. . . . . <b>CTCACCCAGAGTCACTTAA</b> . . . . . TTG TTTAGTT CGAAAT GACTTCGTG |              |
| 2                              | #19-106  | T AT GGAGTTT GAGGATT CTTCT CGCTT CTGTCGATCTCTCGCTGTTATTTTTGTTTTTTTCAGT GA. . . . . <b>A</b> AATTGTAAATGAAGTTG TTTAGTT CGAAAT GACTTCGTG                |              |

- = SNP
- = overlap possible
- = insertion

**Note:** Filler DNAs are likely originated from host genomes or binary vectors. Thanks to an anonymous reviewer who has mapped two filler DNAs to soybean genome.  
 The filler DNA in the sample #19-99 has been mapped to *Glycine\_max\_v2.0:3:1:45779434:1* REF, position: 40891130-40891166.  
 The filler DNA in the sample #19-089 has been mapped to *Glycine\_max\_v2.0:11:1:34766867:1* REF, position: 29587578-29587597 and *Glycine\_max\_v2.0:14:1:49042192:1* REF, position: 33094949-33094967 (reverse, complement), respectively.

S3) Target events from the Plasmid 1 with short LB, reverse orientation insertions, chromosome linkages at GOI terminator

|           |          | T-DNA                                      |                                 | <----Chr06                       |                                     |
|-----------|----------|--------------------------------------------|---------------------------------|----------------------------------|-------------------------------------|
|           |          | T-Mt.PSII---->                             |                                 | DT5.1 -->                        | <----DT5.1                          |
|           |          |                                            |                                 | INVERTED REPEAT---->             | <----INVERTED REPEAT                |
| # INSERTS | Sample # | T TAGCTTTTGTCTTACTGTTGGTTTTTGCCTAAAGCGGCGG | CTTTAGACTTTAGCTCCTCTGTTG        | CAACAGAGGAGCTAAAGTCTAAAGA        | CAGAACGAAGGAAAAGAAATAATAAT          |
| 1         | #19-060  | T TAGCTTTTGTCTTACTGTTGGTTTTTGCCTAAAGCGGCGG | CTTTAGACT . . . . .             | . . . . . AGGAGCTAAAGTCTAAAGA    | CAGAACGAAGGAAAAGAAATAATAAT          |
| 1         | #19-068  | T TAGCTTTTGTCTTACTGTTGGTTTTTGCCTAAAGCGGCGG | CTTTA . . . . .                 | . . . . . AAG                    | CAGAACGAAGGAAAAGAAATAATAAT          |
| 1         | #19-069  | T TAGCTTTTGTCTTACTGTTGGTTTTTGCCTAAAGCGGCGG | CTTTAGACTTTAGCTCCTC . . . . .   | . . . . . AGAGGAGCTAAAGTCTAAAGA  | CAGAACGAAGGAAAAGAAATAATAAT          |
| 1         | #19-070  | T TAGCTTTTGTCTTACTGTTGGTTTTTGCCTAAAGCGGCGG | CTTTAGACTTTAGCT . . . . .       | AAACACGAGCTTG                    | . . . . . TAAAGA                    |
| 1         | #19-073  | T TAGCTTTTGTCTTACTGTTGGTTTTTGCCTAAAGCGGCGG | CTTTAGACTTTAGCTCCTC . . . . .   | . . . . . GCTAAAGTCTAAAGA        | CAGAACGAAGGAAAAGAAATAATAAT          |
| 1         | #19-074  | T TAGCTTTTGTCTTACTGTTGGTTTTTGCCTAAAGCGGCGG | CTTTAGACTTTAGCTCCTCT . . . . .  | . . . . . AAAGTCTAAAGA           | CAGAACGAAGGAAAAGAAATAATAAT          |
| 1         | #19-075  | T TAGCTTTTGTCTTACTGTTGGTTTTTGCCTAAAGCGGCGG | CTTTAGACTTTA . . . . .          | . . . . . AAG                    | CAGAACGAAGGAAAAGAAATAATAAT          |
| 1         | #19-079  | T TAGCTTTTGTCTTACTGTTGGTTTTTGCCTAAAGCGGCGG | CTTTAGACTTTAGCTCCTC . . . . .   | GAGGAGCTAAAGTCTAAAGA             | CAGAACGAAGGAAAAGAAATAATAAT          |
| 1         | #19-084  | T TAGCTTTTGTCTTACTGTTGGTTTTTGCCTAAAGCGGCGG | CTTTAGACTTTAGCTCCTC . . . . .   | . . . . . CAGAGGAGCTAAAGTCTAAAGA | CAGAACGAAGGAAAAGAAATAATAAT          |
| 1         | #19-095  | T TAGCTTTTGTCTTACTGTTGGTTTTTGCCTAAAGCGGCGG | CTT . . . . .                   | . . . . . AGGAGCTAAAGTCTAAAGA    | CAGAACGAAGGAAAAGAAATAATAAT          |
| 1         | #19-097  | T TAGCTTTTGTCTTACTGTTGGTTTTTGCCTAAAGCGGCGG | CTTTAGACTTTAGC . . . . .        | . . . . . CAGAGGAGCTAAAGTCTAAAGA | CAGAACGAAGGAAAAGAAATAATAAT          |
| 1         | #19-098  | T TAGCTTTTGTCTTACTGTTGGTTTTTGCCTAAAGCGGCGG | CTTTAGACTTTAGCTCCTC . . . . .   | . . . . . AGGAGCTAAAGTCTAAAGA    | CAGAACGAAGGAAAAGAAATAATAAT          |
| 1         | #19-099  | T TAGCTTTTGTCTTACTGTTGGTTTTTGCCTAAAGCGGCGG | CTTTAGACTTTAGCTCCTCTG . . . . . | . . . . . AGGAGCTAAAGTCTAAAGA    | CAGAACGAAGGAAAAGAAATAATAAT          |
| 1         | #19-101  | T TAGCTTTTGTCTTACTGTTGGTTTTTGCCTAAAGCGGCGG | CTTTAGACTTTAGCTCCTC . . . . .   | . . . . . AGGAGCTAAAGTCTAAAGA    | CAGAACGAAGGAAAAGAAATAATAAT          |
| 2         | #19-065  | T TAGCTTTTGTCTTACTGTTGGTTTTTGCCTAAAGCGGCGG | CTTTAGACTT . . . . .            | . . . . . AGCTAAAGTCTAAAGA       | CAGAACGAAGGAAAAGAAATAATAAT          |
| 2         | #19-067  | T TAGCTTTTGTCTTACTGTTGGTTTTTGCCTAAAGCGGCGG | CT . . . . .                    | . . . . . AAAG                   | CAGAACGAAGGAAAAGAAATAATAAT          |
| 2         | #19-072  | T TAGCTTTTGTCTTACTGTTGGTTTTTGCCTAAAGCGGCGG | CTTTAGACTTTAGCTCCTCT . . . . .  | . . . . . AGGAGCTAAAGTCTAAAGA    | CAGAACGAAGGAAAAGAAATAATAAT          |
| 2         | #19-087  | T TAGCTTTTGTCTTACTGTTGGTTTTTGCCTAAAGCGGCGG | CTTTAGACTTTAGCTC . . . . .      | . . . . .                        | . . . . . AGAACGAAGGAAAAGAAATAATAAT |
| 2         | #19-088  | T TAGCTTTTGTCTTACTGTTGGTTTTTGCCTAAAGCGGCGG | CTTTAGACTTTAGCTCCTC             | GAGGAGCTAAAGTCTAAAGA             | CAGAACGAAGGAAAAGAAATAATAAT          |
| 2         | #19-089  | T TAGCTTTTGTCTTACTGTTGGTTTTTGCCTAAAGCGGCGG | CTTTAGAC . . . . .              | . . . . . AG                     | CAGAACGAAGGAAAAGAAATAATAAT          |
| 2         | #19-106  | T TAGCTTTTGTCTTACTGTTGGTTTTTGCCTAAAGCGGCGG | CTTTAGACTTTAGC . . . . .        | . . . . . TAAAGTCTAAAGA          | CAGAACGAAGGAAAAGAAATAATAAT          |

S4) Target events from the Plasmid 1 with short LB, forward orientation insertions, chromosome linkages at *lox* end of T-DNA

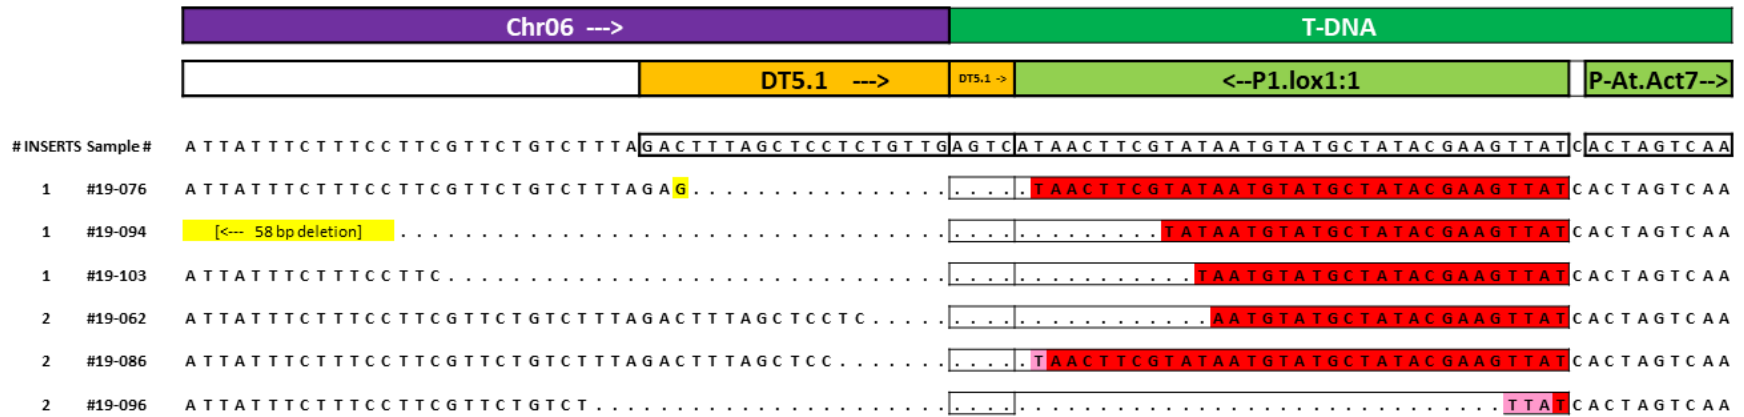

- = truncated lox
- = overlap possible
- = insertion

**S5) Target events from the Plasmid 1 with short LB, forward orientation insertions, linkages at RB-LB junctions**

**27 bp border residue inside intron**

**RB (post-cut)**

|           |          | I-At.Act7 5'--->                                                         | <-- LB (post-cut)                                    | I-At.Act7 3'                        |
|-----------|----------|--------------------------------------------------------------------------|------------------------------------------------------|-------------------------------------|
| # INSERTS | Sample # | TATGGAGTTTGAGGATTCCTTCGCTTCTGTCGATCTCTCGCTGTTATTTTTGTTTTTTCAGTGAAGTGCTGG | CAAGGATATATTC AATTGTAATGAAGTTGTTTAGTTCGAAATGACTTCGTG |                                     |
| 1         | #19-076  | TATGGAGTTTGAGGATTCCTTCGCTTCTGTCGATCTCTCGCTGTTATTTTTGTTTTTTCAGTGAAGTGCTGG |                                                      | TAAATGAAGTTGTTTAGTTCGAAATGACTTCGTG  |
| 1         | #19-094  | TATGGAGTTTGAGGATTCCTTCGCTTCTGTCGATCTCTCGCTGTTATTTTTGTTTTTTCAGT           |                                                      | AATGAAGTTGTTTAGTTCGAAATGACTTCGTG    |
| 1         | #19-103  | TATGGAGTTTGAGGATTCCTTCGCTTCTGTCGATCTCTCGCT                               | TCTGAGC                                              | [--->145 bp deletion of LB] T AATC  |
| 2         | #19-062  | TATGGAGTTTGAGGATTCCTTCGCTTCTGTCGATCTCTCGCTGTTATTTTTGTTTTTTCAGTGAAGTGCTGG |                                                      | TTTAGTTCGAAATGACTTCGTG              |
| 2         | #19-086  | TATGGAGTTTGAGGATTCCTTCGCTTCTGTCGATCTCTCGCT                               |                                                      | GTTGTTTAGTTCGAAATGACTTCGTG          |
| 2         | #19-096  | TATGGAGTTTGAGGATTCCTTCGCTTCTGTCGATCTCTCGCTGTTATTTTTGTTTTTTCAGTGAAGTGCTGG |                                                      | TGTAATGGCGTTGTTTAGTTCGAAATGACTTCGTG |

S6) Target events from the Plasmid 1 with short LB, forward orientation insertions, chromosome linkages at GOI terminator

|           |         | T-DNA                                |              |                        |          | Chr06 -->                           |
|-----------|---------|--------------------------------------|--------------|------------------------|----------|-------------------------------------|
|           |         | T-Mt.PSII-->                         | NotI         | DT5.1 -->              | DT5.1 -> |                                     |
| # INSERTS | Sample# | T TAGCTTTTGTCTTTACTGTTGGTTTTTTGCCAAA | GCGGCCGCTTTA | GACTTTAGCTCCTCTGTTGAGT | C        | T AAA CAACACTACATCTGACCTAAGAATGAG   |
| 1         | #19-076 | T TAGCTTTTGTCTTTACTGTTGGTTTTTTGCCAAA | GCGGCCGCTTTA | GACTTTAGCTCCTCTGTTGAGT | C        | T AAA CAACACTACATCTGACCTAAGAATGAG   |
| 1         | #19-094 | T TAGCTTTTGTCTTTACTGTTGGTTTTTTGCCAAA | GCGGCCGCTTTA | GACTTTAGCTCCTCTGTTGAGT | C        | ... [---> 60 bp deletion] ... CCATG |
| 1         | #19-103 | T TAGCTTTTGTCTTTACTGTTGGTTTTTTGCCAAA | GCGGCCGCTTTA | GACTTTAGCTCCTCTGTTGAGT | C        | ... AAA CAACACTACATCTGACCTAAGAATGAG |
| 2         | #19-062 | T TAGCTTTTGTCTTTACTGTTGGTTTTTTGCCAAA | GCGGCCGCTTTA | GACTTTAGCTCCTCTGTTGAGT | C        | ... AACACTACATCTGACCTAAGAATGAG      |
| 2         | #19-086 | T TAGCTTTTGTCTTTACTGTTGGTTTTTTGCCAAA | GCGGCCGCTTTA | GACTTTAGCTCCTCTGTTGAGT | C        | ... AACACTACATCTGACCTAAGAATGAG      |
| 2         | #19-096 | T TAGCTTTTGTCTTTACTGTTGGTTTTTTGCCAAA | GCGGCCGCTTTA | GACTTTAGCTCCTCTGTTGAGT | C        | ... AAA CAACACTACATCTGACCTAAGAATGAG |

■ Mutation and truncation

S7) Target events from the Plasmid 2 with long LB, reverse orientation insertions, chromosome linkages at *lox* end of T-DNA

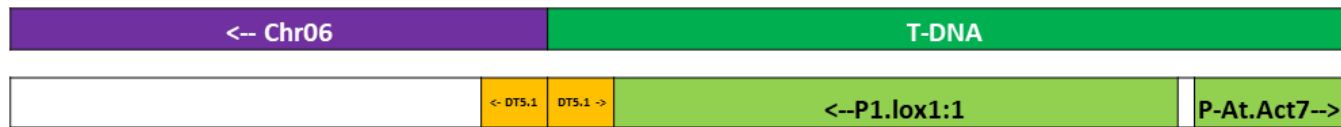

| INSERT # | Sample # | Sequence                                                                                                                                       |
|----------|----------|------------------------------------------------------------------------------------------------------------------------------------------------|
|          |          | ATTCTTAGGTCAGATGTAGTGT TGT TTA <span style="border: 1px solid black;">GACTAGTCA</span> ATAACTTCGTATAATGTATGCTATACGAAGTTATCACTAGTCAA            |
| 1        | #19-004  | ATTCTTAGGTCAGATGTAGTGT TGT T . . . . . <span style="background-color: red;">TAACTTCGTATAAATGTATGCTATACGAAGTTAT</span> CACTAGTCAA               |
| 1        | #19-006  | ATTCTTAGGTCAGATGTAGTGT TGT TTA <span style="border: 1px solid black;">GAC . . . TC</span> ATAACTTCGTATAATGTATGCTATACGAAGTTATCACTAGTCAA         |
| 1        | #19-014  | ATTCTTAGGTCAGATGTAGTGT TGT TTA <span style="border: 1px solid black;">GA . . . . C</span> ATAACTTCGTATAATGTATGCTATACGAAGTTATCACTAGTCAA         |
| 1        | #19-015  | ATTCTTAGGTCAGATGTAGTGT TGT TTA <span style="border: 1px solid black;">GA . . . . .</span> ATAACTTCGTATAATGTATGCTATACGAAGTTATCACTAGTCAA         |
| 1        | #19-020  | ATTCTTAGGTCAGATGTAGTGT TGT T . . . . . <span style="border: 1px solid black;">AGTCA</span> ATAACTTCGTATAATGTATGCTATACGAAGTTATCACTAGTCAA        |
| 1        | #19-030  | ATTCTTAGGTCAGATGTAGTGT TGT TTA <span style="border: 1px solid black;">GAC . . . TC</span> ATAACTTCGTATAATGTATGCTATACGAAGTTATCACTAGTCAA         |
| 1        | #19-032  | ATTCTTAGGTCAGATGT . . . . . <span style="border: 1px solid black;">. . . . . AGTCA</span> ATAACTTCGTATAATGTATGCTATACGAAGTTATCACTAGTCAA         |
| 1        | #19-034  | ATTCTTAGGTCAGATGTAGTGT TGT TTA <span style="border: 1px solid black;">G . . . . AGTCA</span> ATAACTTCGTATAATGTATGCTATACGAAGTTATCACTAGTCAA      |
| 1        | #19-045  | ATTCTTAGGTCAGATGTAGTGT TGT TTA <span style="border: 1px solid black;">G . . . . AGTCA</span> ATAACTTCGTATAATGTATGCTATACGAAGTTATCACTAGTCAA      |
| 2        | #19-044  | ATTCTTAGG . . . . . <span style="border: 1px solid black;">. . . . . C</span> ATAACTTCGTATAATGTATGCTATACGAAGTTATCACTAGTCAA                     |
| 2        | #19-047  | ATTCTTAGGTCAGATGTAGTGT TGT T . . . . . <span style="border: 1px solid black;">. . . . . TC</span> ATAACTTCGTATAATGTATGCTATACGAAGTTATCACTAGTCAA |

= truncated lox

= assignable to either end; suggests overlap of ends contributes to linking

S8) Target events from the Plasmid 2 with long LB, reverse orientation insertions, linkages at RB-LB junctions

**289 bp border residue inside intron**

| INSERT # Sample # | I-At.Act7 5' --->                                                               | RB (post-cut)<br><--                               | <-- LB (post-cut)                                             |
|-------------------|---------------------------------------------------------------------------------|----------------------------------------------------|---------------------------------------------------------------|
|                   | TA TGGAGTTTGAGGATTCCTTCTCGCTTCTGTCGATCTCTCGCTGTTATTTTTGTTTTTTT CAGTGAAGTGC TGG  | CAGGATATATTCAATTGAAATGGCTTCATGTCCGGGAAATCTACATGGAT |                                                               |
| 1 #19-004         | TA TGGAGTTTGAGGATTCCTTCTCGCTTCTGTCGATCTCTCGCTGTTATTTTTGTTTTTTT CAGTGAAGTGC TGG  | .....                                              | ..... AT                                                      |
| 1 #19-006         | TA TGGAGTTTGAGGATTCCTTCTCGCTTCTGTCGATCTCTCGCT.....                              | .....                                              | ..... GCTTCATGTCCGGGAAATCTACATGGAT                            |
| 1 #19-014         | TA TGGAGTTTGAGGATTCCTTCTCGCTTCTGTCGATCTCTCGCTGTTATTTTTGTTTTTTT CAGTGAAGTG.....  | .....                                              | ..... TCCGGGAAATCTACATGGAT                                    |
| 1 #19-015         | TA TGGAGTTTGAGGATTCCTTCTCGCTTCTGTCGATCTCTCGCTGTTATTTTTGTTTTTTT CAGTGAAGTGC TGG  | .....                                              | ..... [--->338 bp deletion of LB, 7 bp unannotated insertion] |
| 1 #19-020         | TA TGGAGTTTGAGGATTCCTTCTCGCTTCTGTCGATCTCTCGCTGTTATTTTTGT.....                   | .....                                              | ..... GGCTTCATGTCCGGGAAATCTACATGGAT                           |
| 1 #19-030         | TA TGGAGTTTGAGGATTCCTTCTCGCTTCTGTCGATCTCTCGCTGTTATTTTTGTTTTTTT CAGTGA.....      | .....                                              | ..... TCCGGGAAATCTACATGGAT                                    |
| 1 #19-032         | T..... [ +10bp insetion ]                                                       | .....                                              | ..... TATATTCAATTGAAATGGCTTCATGTCCGGGAAATCTACATGGAT           |
| 1 #19-034         | TA TGGAGTTTGAGGATTCCTTCTCGCTTCTGTCGATCTCTCGCTGTTATTTTTGTTTTTTT CAGTGAAGTGC TGG  | .....                                              | ..... CTA CATGGAT                                             |
| 1 #19-045         | TA TGGAGTTTGAGGATTCCTTCTCGCTTCTGTCGATCTCTCGCTGTTAT.....                         | .....                                              | ..... [---> 145 bp deletion of LB]                            |
| 2 #19-044         | TA TGGAGTTTGAGGATTCCTTCTCGCTTCTGTCGATCTCTCGCTGTTATTTTTGTTTTTTT CAGTGAAGTGC..... | .....                                              | ..... [--->66 bp deletion of LB]                              |
| 2 #19-047         | TA TGGAGTTTGAGGATTCCTTCTCGCTTCTGTCGATCTCTCGCTGTTATTTTTGTTTTT.....               | .....                                              | ..... [--->113 bp deletion of LB]                             |



S9) Target events from the Plasmid 2 with long LB, reverse orientation insertions, chromosome linkages at GOI terminator

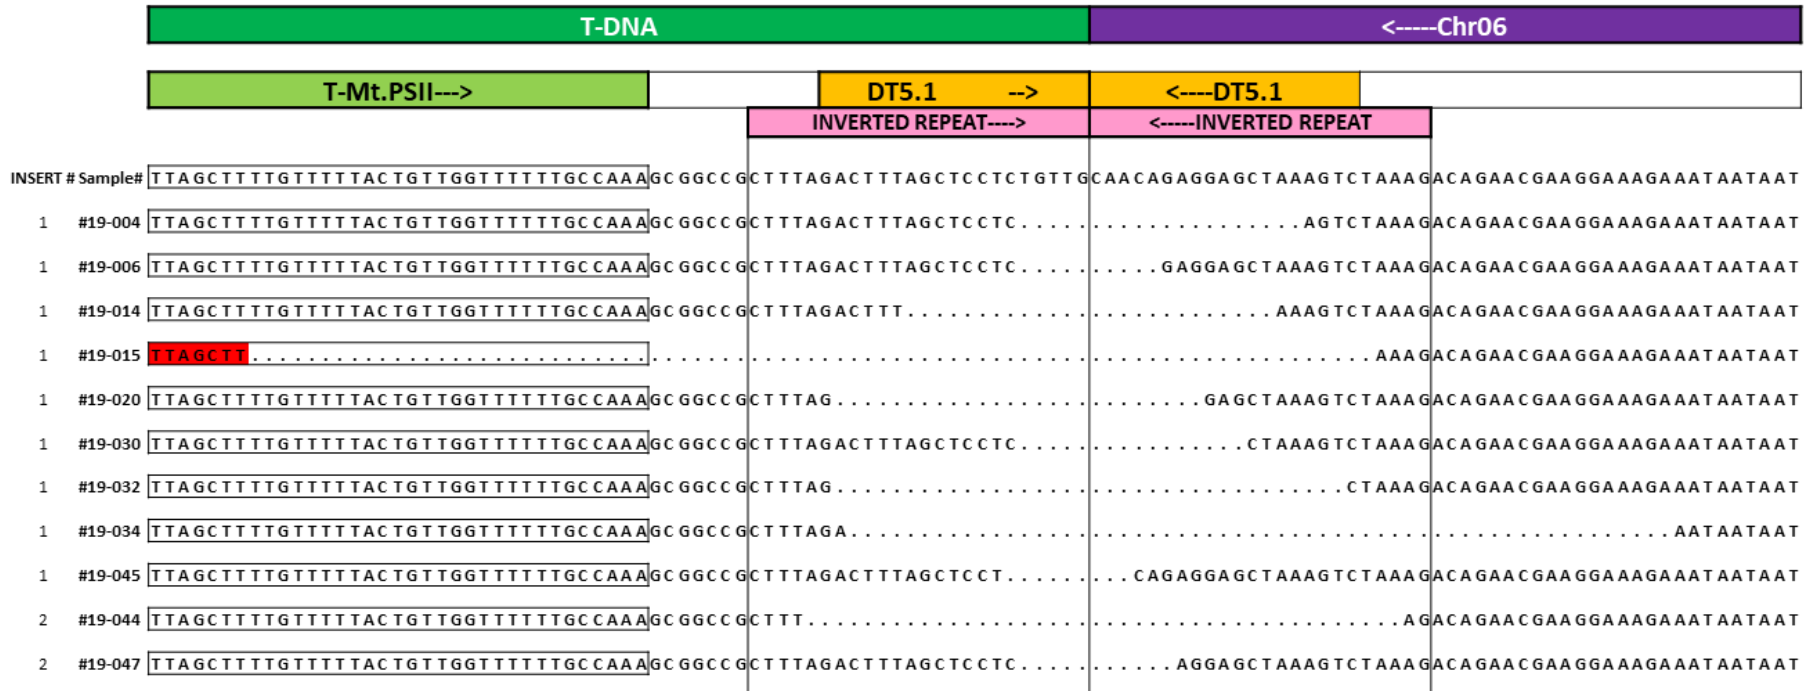

S10) Target events from the Plasmid 2 with short LB, forward orientation insertions, chromosome linkages at *lox* end of T-DNA

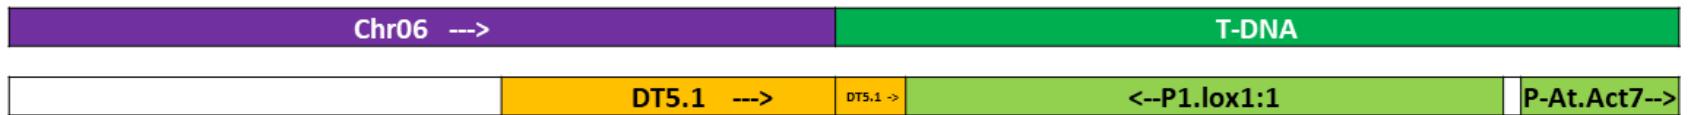

| INSERT# | Sample # | ATTATTTCTTTCTTCGTTCTGTCTTTAGACTTTAGCTCCTCTGTTG | AGTC            | ATAACTTCGTATAATGTATGCTATACGAAGTTAT     | CACTAGTCAA |
|---------|----------|------------------------------------------------|-----------------|----------------------------------------|------------|
| 2       | #19-029  | ATTATTTCTTTCTT.....                            | .....           | <b>TTCGTATAATGTATGCTATACGAAGTTAT</b>   | CACTAGTCAA |
| 2       | #19-035  | ATTATTTCTTTCTTCGTTCTGTCTTTAGACTTTAG.....       | <b>CA</b> ..... | AGTCATAACTTCGTATAATGTATGCTATACGAAGTTAT | CACTAGTCAA |

■ = truncated lox  
■ = insertion

**S11) Target events from the Plasmid 2 with long LB, forward orientation insertions, linkages at RB-LB junctions**

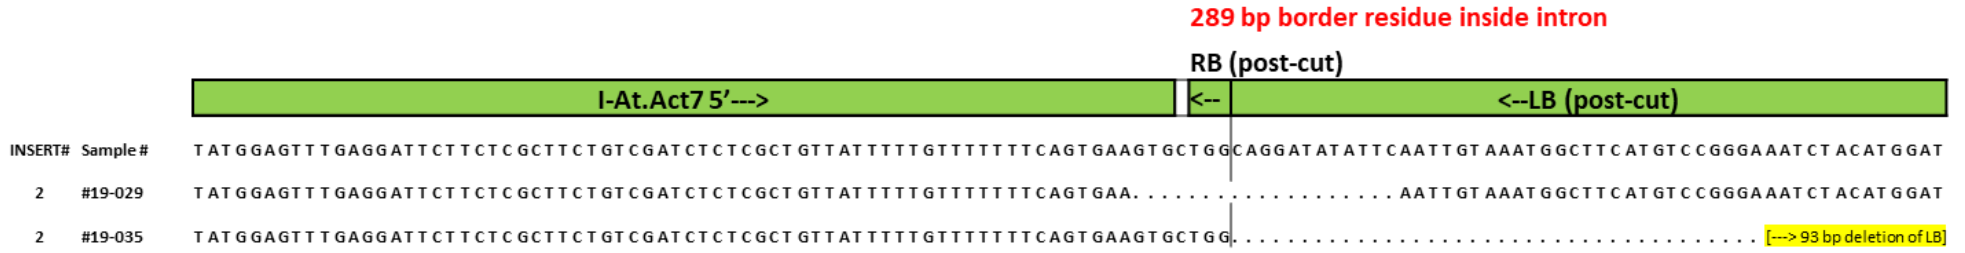

**S12) Target events from the Plasmid 2 with long LB, forward orientation insertions, chromosome linkages at GOI terminator**

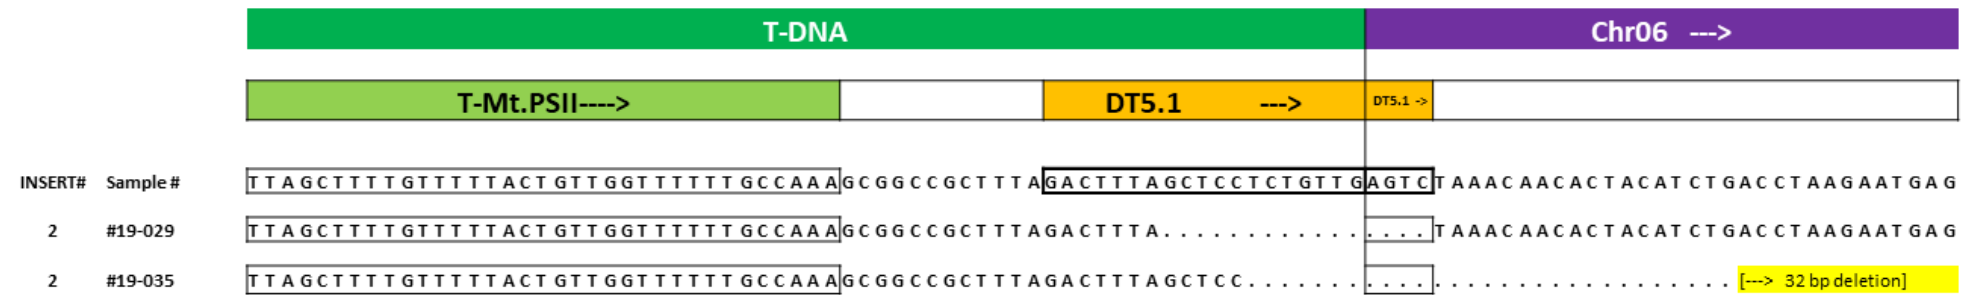

Supplement: PBI-22-1926-s001.pdf [file PBI-22-1926-s001.pdf]
